# Supplementary material for: Formate dehydrogenase activity by a Cu(ii)-based molecular catalyst and deciphering the mechanism using DFT studies
Source: Royal Society of Chemistry journal article supplement (doi:10.1039/d3dt03023g), 2023-12-05
Supplement: d3dt03023g1.pdf [file d3dt03023g1.pdf]

# Formate Dehydrogenase Activity by a Cu(II)-based Molecular Catalyst and Deciphering the Mechanism by DFT studies

## SUPPORTING INFORMATION

*Aman Mishra; † Diship Srivastava; ‡ Dev Raj; † Niladri Patra; ‡ Sumanta Kumar Padhi †, \**

<sup>†</sup> Artificial Photosynthesis Laboratory, Department of Chemistry and Chemical Biology, Indian Institute of Technology (Indian School of Mines), Dhanbad, 826004.

<sup>‡</sup> Department of Chemistry and Chemical Biology, Indian Institute of Technology (Indian School of Mines), Dhanbad, 826004.

\*E-mail: [sumanta@iitism.ac.in](mailto:sumanta@iitism.ac.in)

### **Materials and methods**

Commercially available reagent-grade compounds were employed in this study. No additional purification was required for the chemicals purchased from Sigma Aldrich or Alfa Aesar for synthesis purposes. Merck supplied all of the analytical-grade solvents that were filtered and dried before use in this project. All experiments were conducted using milli-Q water.

**NMR Spectroscopy.** At room temperature, Bruker Ultrashield NMR spectrometer (400 MHz) was used to record <sup>1</sup>H and <sup>13</sup>C NMR spectra using tetramethylsilane as an internal standard.

**EPR Spectroscopy.** X-band EPR spectra were recorded at 120 K using a Bruker EMX 1444 EPR spectrometer operating at 9.442 GHz. Spectra were treated using the Bruker WINEPR software and simulated using the Bruker SIMFONIA software. The experimental parameters are listed as follows.

| S.N.# | Microwave        |             | Modulation       |                | Temperature (K) |
|-------|------------------|-------------|------------------|----------------|-----------------|
|       | Frequency<br>GHz | Power<br>mW | Frequency<br>kHz | Amplitude<br>G |                 |
| 1     | 9.455            | 2.52        | 100              | 1.98           | 120             |
| 2     | 9.45             | 2.01        | 100              | 1.98           | 120             |
| 3     | 9.5              | 2.01        | 100              | 2.08           | 120             |
| 4     | 9.44             | 2.01        | 100              | 2.08           | 120             |

# 1. Frozen MeOH and toluene for [Cu(N<sub>3</sub>Q<sub>3</sub>)Cl]Cl complex.  
2. Frozen MeOH and toluene for [Cu(N<sub>3</sub>Q<sub>3</sub>)Cl]Cl complex in the presence of HCOOH and HCOONa.  
3. Frozen water for [Cu(N<sub>3</sub>Q<sub>3</sub>)Cl]<sup>+</sup> complex.  
4. Frozen water for [Cu(N<sub>3</sub>Q<sub>3</sub>)Cl]<sup>+</sup> complex in the presence of HCOOH and HCOONa after heated at 70 °C.

**Mass Spectrometry.** Waters Micromass Q-ToF Micro and Bruker MICROTOF-Q11 systems recorded high-resolution ESI mass spectra.

**X-ray crystallographic analysis.** A Bruker APEX-II CCD diffractometer single-crystal X-ray diffractometer was used to gather the single-crystal X-ray diffraction data of the single crystal of copper complex. The CrysAlisPro programme was used to gather and analyse data for the research. The images were captured using an EosS2 CCD detector and processed using CrysAlisPro software. Crystal data were acquired at 293 K using CrysAlisPro (Rigaku Oxford Diffraction, 2017), and the structure was solved using the Charge Flipping solution programme in Olex2 (Rigaku Oxford Diffraction) employing spherical harmonics for empirical absorption correction.

**Gas evolution.** The gas evolution was established on manometric observations in a 5 mL double-jacketed reaction vessel with a headspace capacity of 3 mL and 2 mL of the reaction mixture. There were 2 mL of water in the reference cell and 3 mL of headspace in the working cell. The ideal gas equation  $PV = nRT$  was used to convert the H<sub>2</sub> and CO<sub>2</sub> produced during dehydrogenation into micromoles. A TESTO 521 differential pressure manometer with a measurement range of 0 to 100 hPa and an accuracy of 0.1 hPa was used to gauge the evolved gas pressure.

**Gas Detection.** The gaseous product was recorded through CIC GC-2011 Gas chromatography through a porapak Q or molecular sieve column with a TCD detector and argon as a carrier gas.

**Cyclic Voltammetry.** All the electrochemical measurements for complex [Cu(N<sub>3</sub>Q<sub>3</sub>)Cl]Cl using cyclic voltammetry techniques were performed in CHI1140C

electrochemical workstation under a nitrogen atmosphere with a scan rate of 100 mV s<sup>-1</sup> in organic and aqueous medium at room temperature. The three electrodes system used **glassy carbon**, **Pt wire**, and **saturated calomel** as working, counter, and reference electrodes throughout the cyclic voltammetric experiments.

**Computational method.** All density functional theory (DFT) level computations were carried out using Gaussian 09 package [1] with unrestricted B3LYP-D3 functional [2-4]. All geometries were optimized using 6-311+G(d,p) [5,6] basis set for all atoms except Cu, for which effective core potential type LANL2DZ [8-10] basis set was used. The numerical integrals were computed using the Gaussian's ultrafine grid option enabled. The Integral equation formalism polarizable continuum mode model (IEFPCM) [7] was used to account for water solvation medium. Vibrational frequencies under harmonic approximations at 298.15 K, of optimized geometry of all structures were calculated using the same basis set mentioned above, and was used to distinguish between intermediate and transition state (TS) structures. The presence of single imaginary frequency for the stationary states was taken as sign of TS structure and intrinsic reaction calculation was carried out to corroborate that connections between TS structure and its forward and backward minima [11]. The frequency calculation was also used to obtain the thermal contributions to the free energy of each chemical species. Later, IEFPCM solvated B3LYP-D3 single point calculations were performed on each species using basis set effective core potential type LANL2DZ for Cu and 6-311+G(2df,p) for other elements, using the previous optimized structure. These single point energies were added to the corresponding thermal contributions to finally arrive at the composite free energies for each chemical species [13]. The 1 M standard state Gibbs free energy of each molecule was calculated by adding entropy penalty required to change concentration from 1/24.5 M to 1 M (1.89 kcal/mol at 298.15 K) to the previously obtained values [14]. Gauss View 5.0.9 program [12] was used for input file preparation, visualization and analysis purposes.

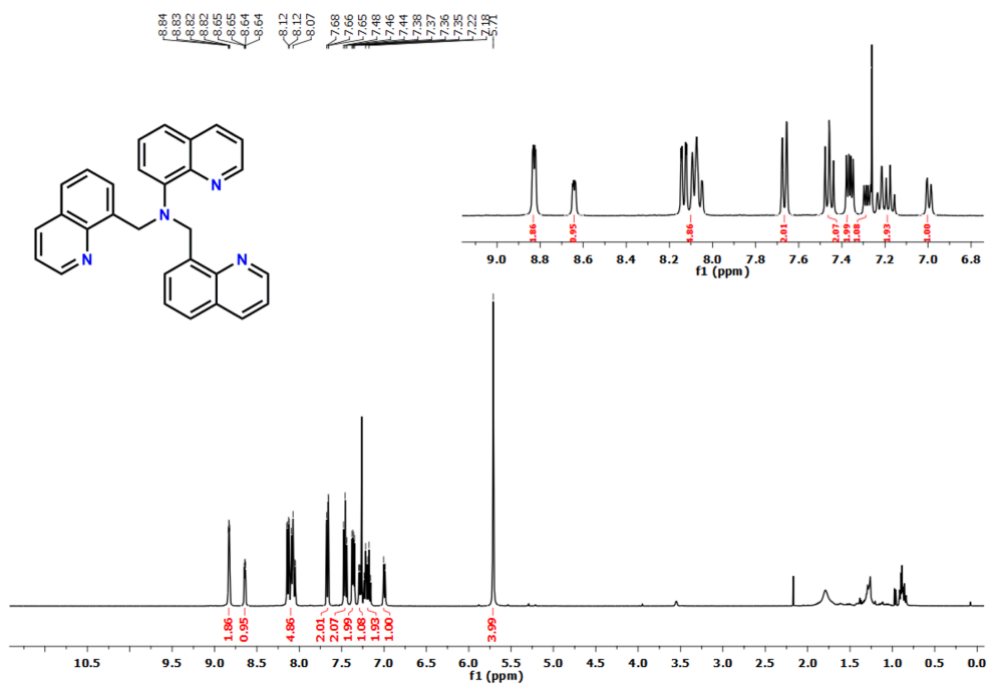

**Figure S1.** <sup>1</sup>H NMR of N<sub>3</sub>Q<sub>3</sub> ligand in CDCl<sub>3</sub>.

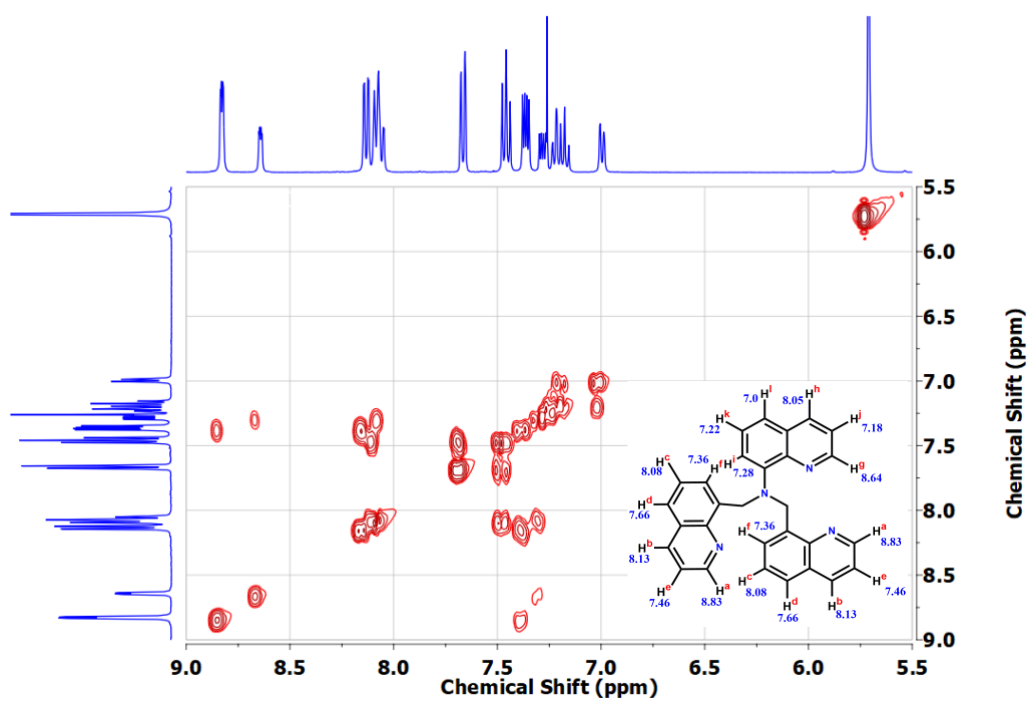

**Figure S2.** <sup>1</sup>H-<sup>1</sup>H COSY NMR spectrum of N<sub>3</sub>Q<sub>3</sub> ligand in CDCl<sub>3</sub>.

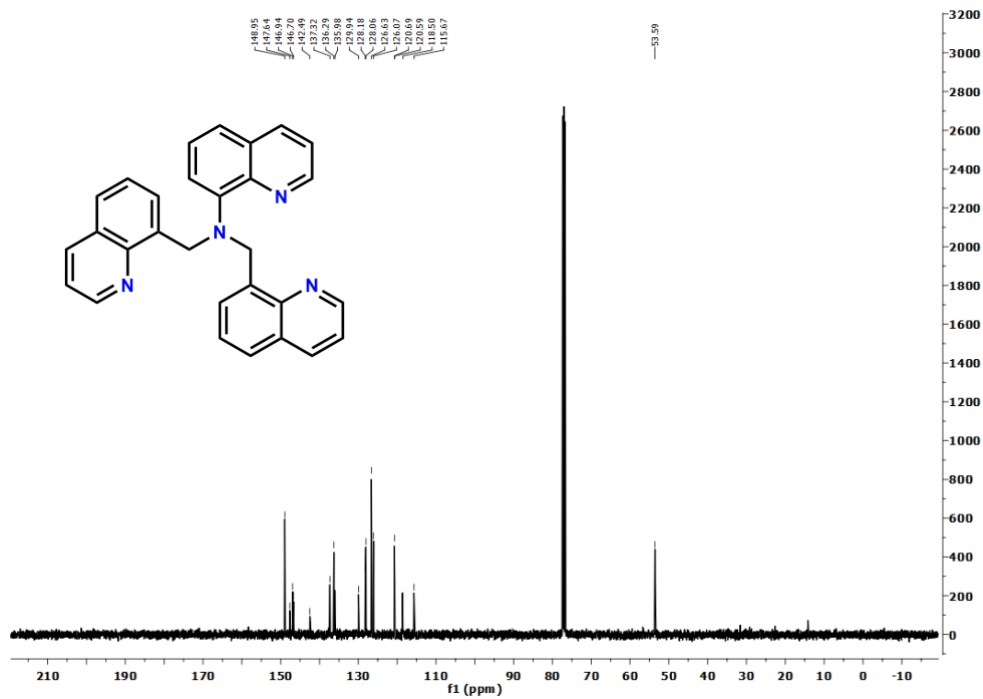

**Figure S3.**  $^{13}\text{C}$  NMR of N3Q3 ligand in  $\text{CDCl}_3$ .

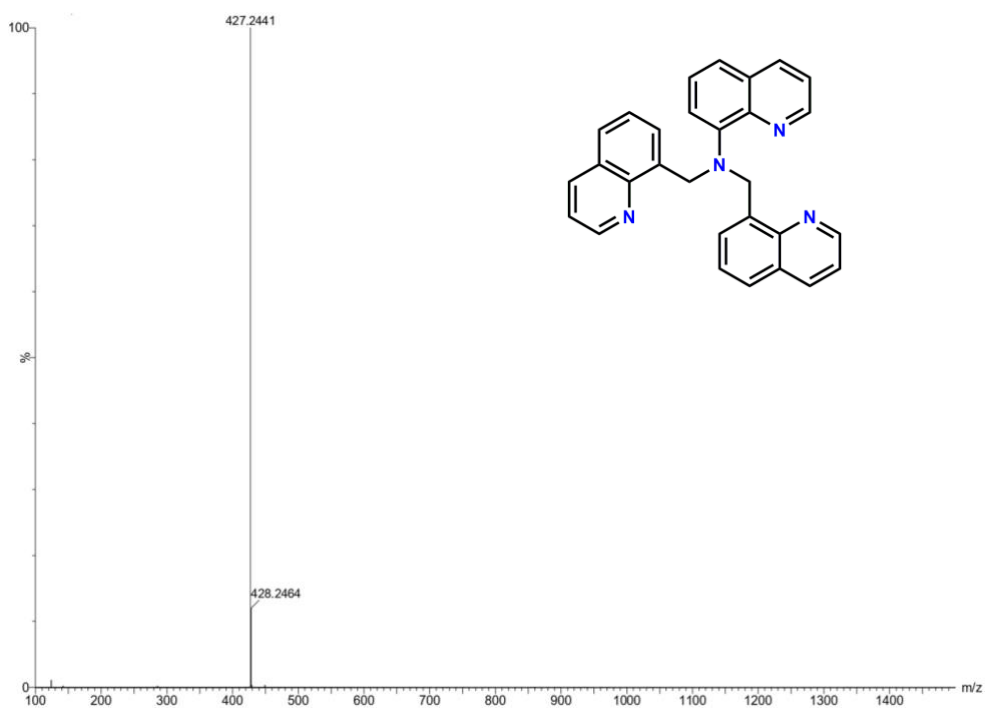

**Figure S4.** ESI-HRMS spectra of N3Q3 ligand in methanol for  $[\text{M}+\text{H}]^+$  m/z.

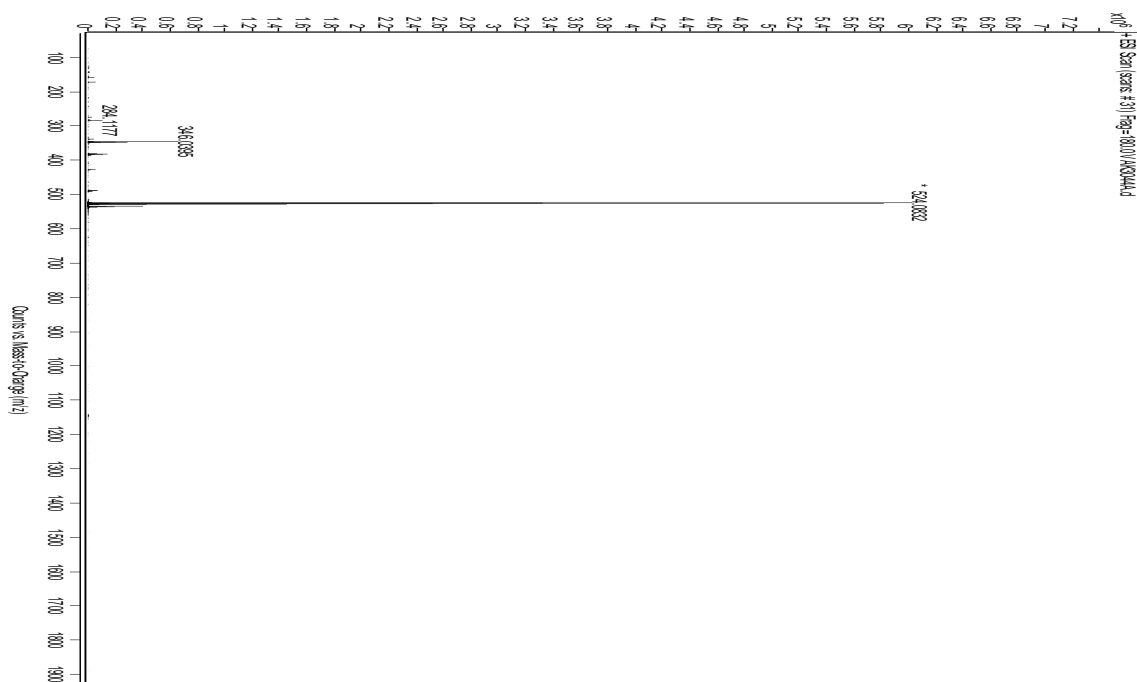

**Figure S5.** ESI-HRMS spectra of  $[\text{Cu}(\text{N}_3\text{Q}_3)\text{Cl}]\text{Cl}$  complex in methanol for  $[\text{C}_{29}\text{H}_{22}\text{CuClN}_4]^+$  i.e.  $[\text{Cu}(\text{N}_3\text{Q}_3)\text{Cl}]^+$ .

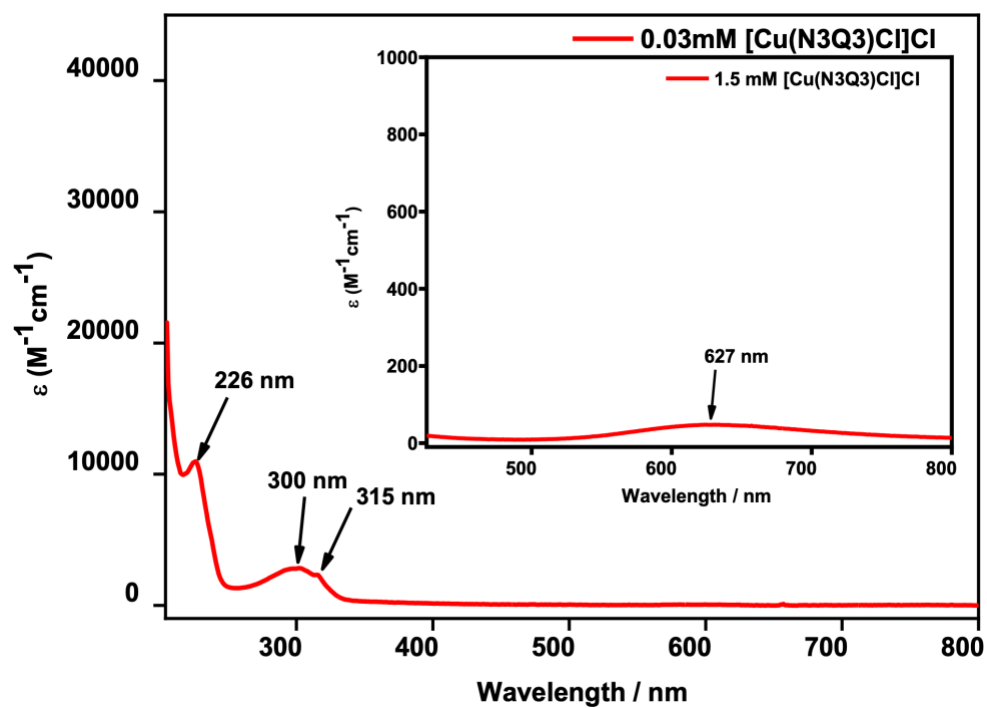

**Figure S6.** The UV-Vis spectrum of  $[\text{Cu}(\text{N}_3\text{Q}_3)\text{Cl}]\text{Cl}$  complex in methanol.

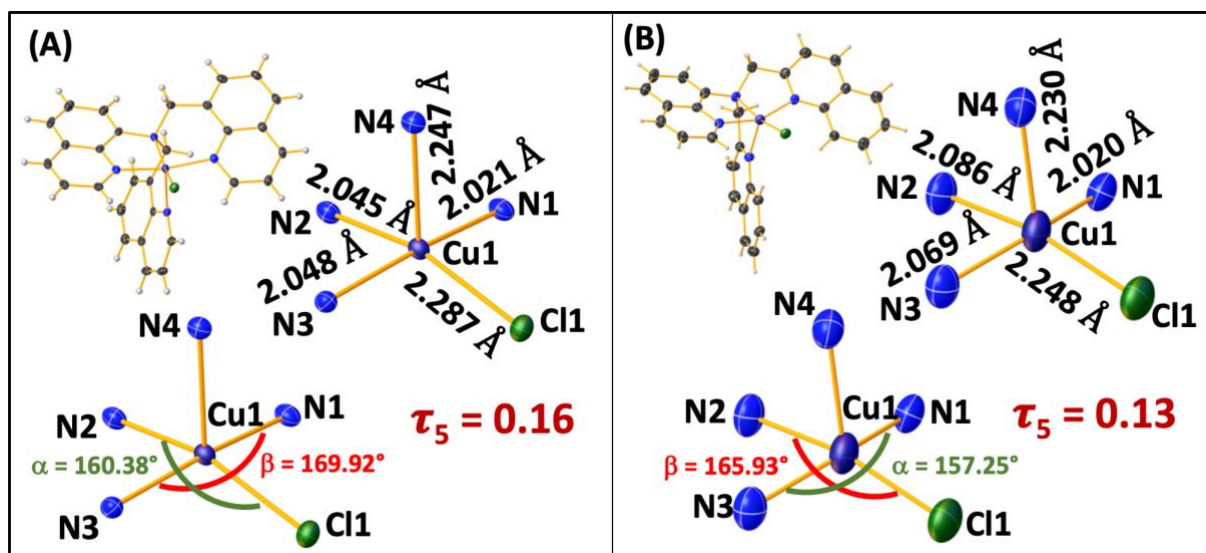

**Figure S7.** The geometrical structure and parameters of  $[\text{Cu}(\text{N}_3\text{Q}_3)\text{Cl}]^+$  and  $[\text{Cu}(\text{o-N}_3\text{Q}_3)\text{Cl}]^+$  (*Spectrochim Acta A Mol Biomol Spectrosc* **2014**, *130*, 390–396).

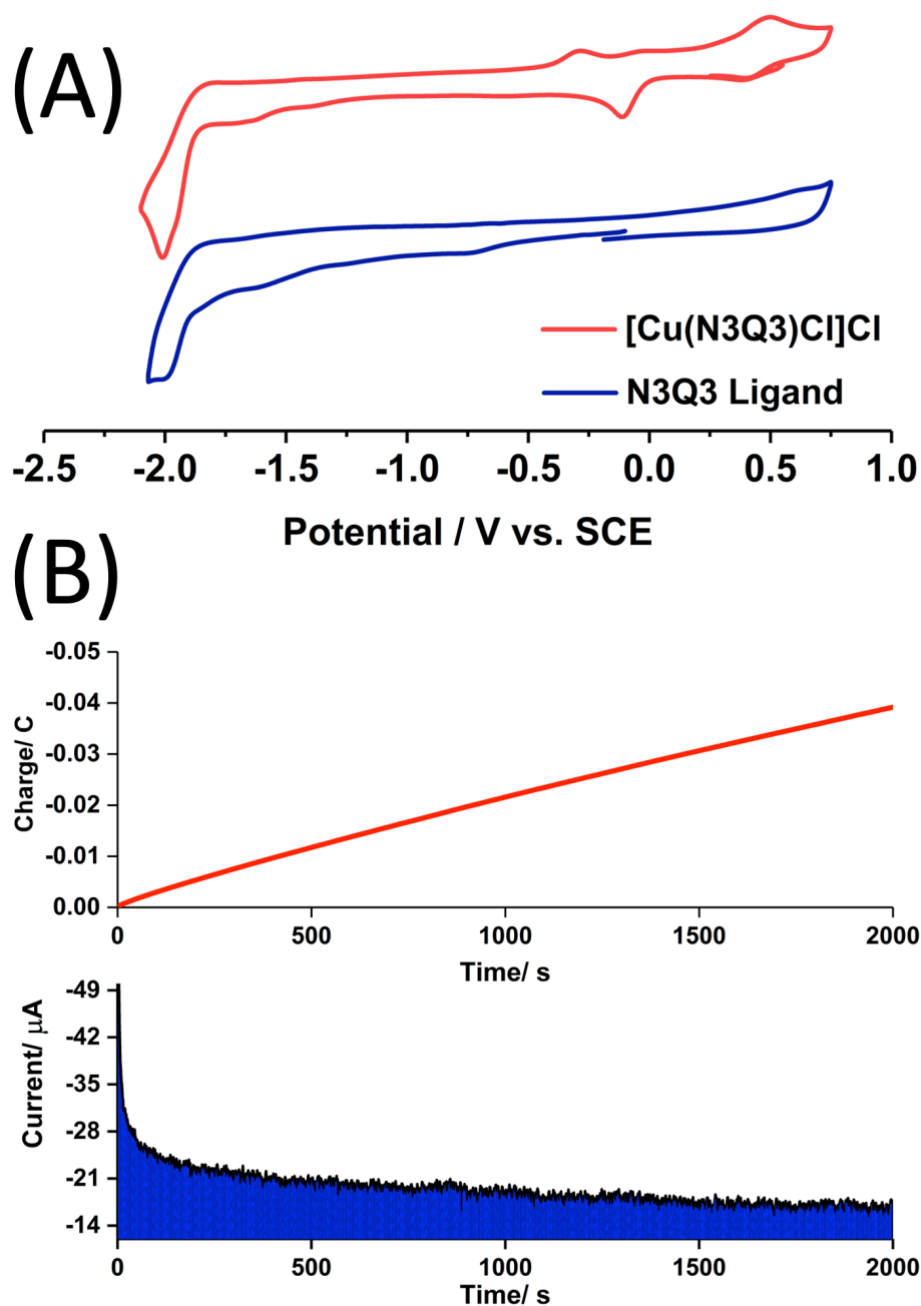

**Figure S8.** (A) Cyclic voltammogram of 1.0 mM  $[\text{Cu}(\text{N3Q3})\text{Cl}]\text{Cl}$  complex (Top) and 1.0 mM N3Q3 ligand. Electrolytic condition: 0.1 M TBAP as supporting electrolyte in DMF medium at a scan rate of  $100 \text{ mV s}^{-1}$  using a three-electrode system. (B) The coulometry of  $[\text{Cu}(\text{N3Q3})\text{Cl}]\text{Cl}$  (Electrocatalytic condition:  $0.20 \mu\text{mol}$  of the complex in 5 mL of  $0.1 \text{ M } ^n\text{Bu}_4\text{NClO}_4$  as supporting electrolyte). TOP: Charge consumed at 2000 s, Bottom: Current vs. Time plot.



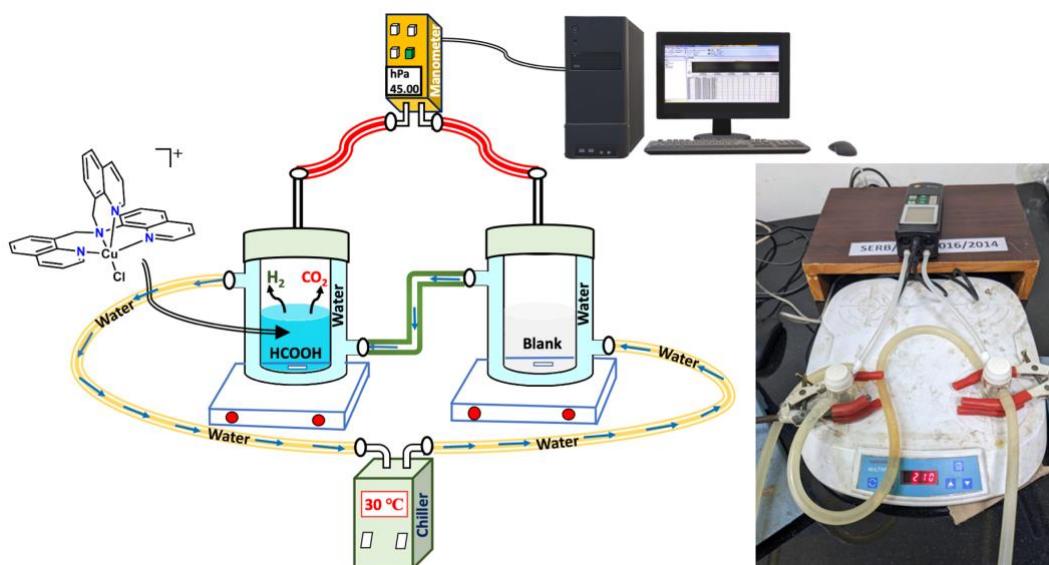

**Figure S9.** A general diagram for the reaction set-up.

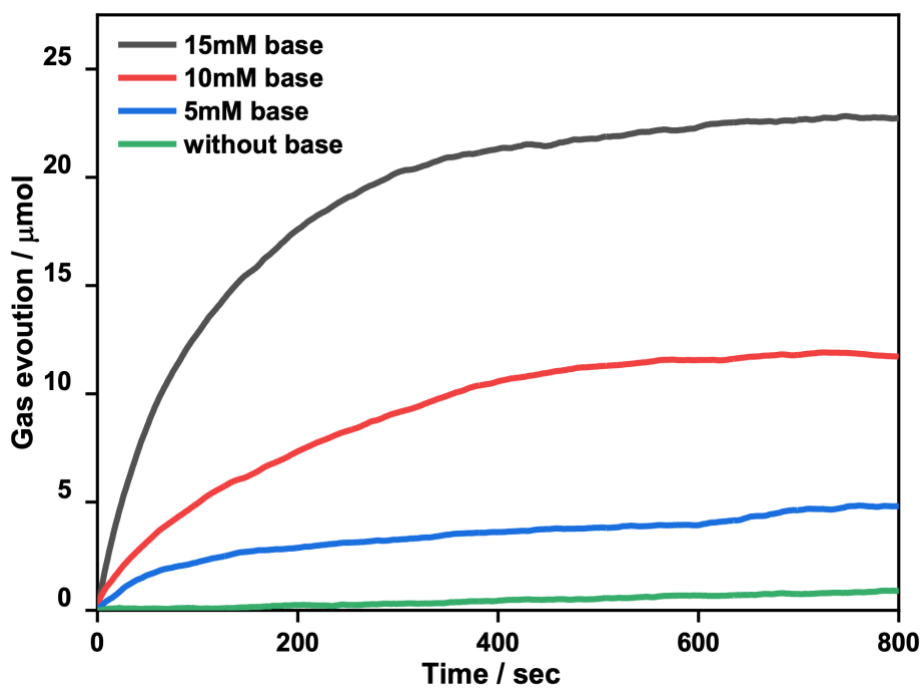

**Figure S10.** Gas evolution by  $[\text{Cu}(\text{N}_3\text{Q}_3)\text{Cl}]\text{Cl}$  complex at  $50\text{ }^\circ\text{C}$  in water with various base concentrations in the presence of  $1.0\text{ mM}$  of complex and  $15\text{ mM}$  of the acid

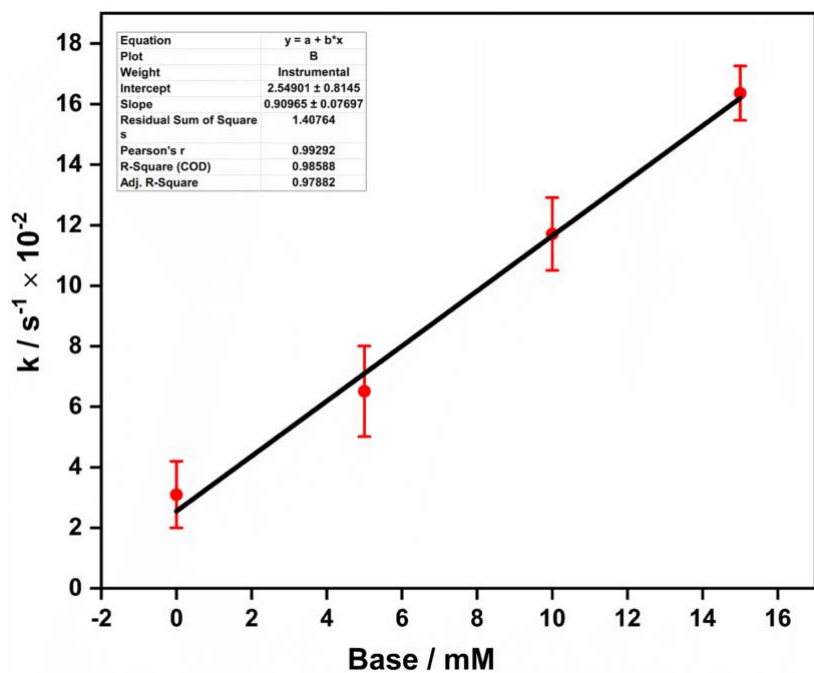

**Figure S11.** Rate of gas evolution *vs.* base in water.

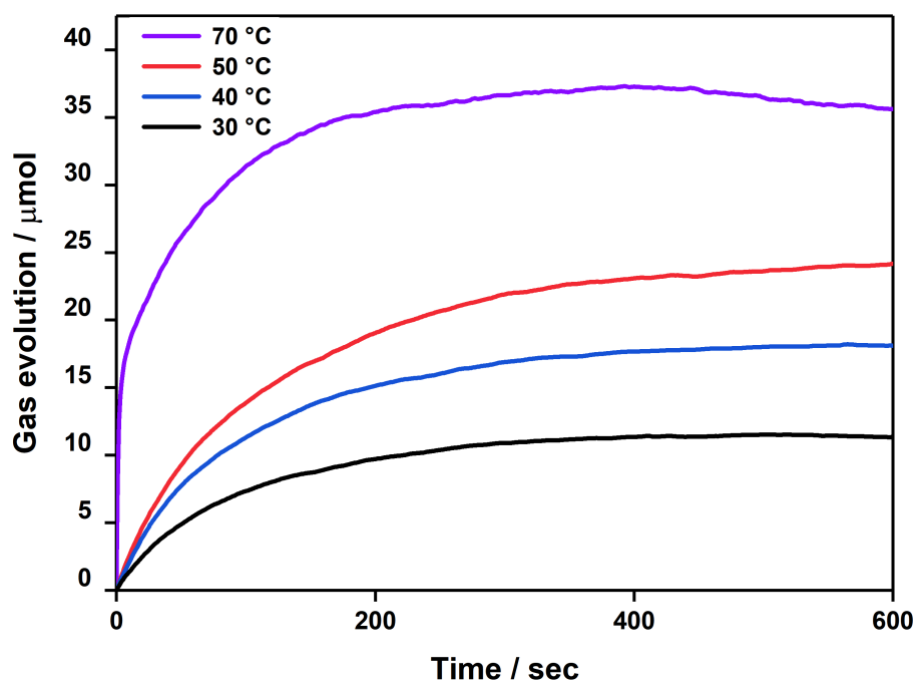

**Figure S12.** Gas evolution by  $[\text{Cu}(\text{N}_3\text{Q}_3)\text{Cl}]\text{Cl}$  complex with temperature variation in the presence of 1.0 mM of complex, 15 mM of the acid and 15 mM of the base.

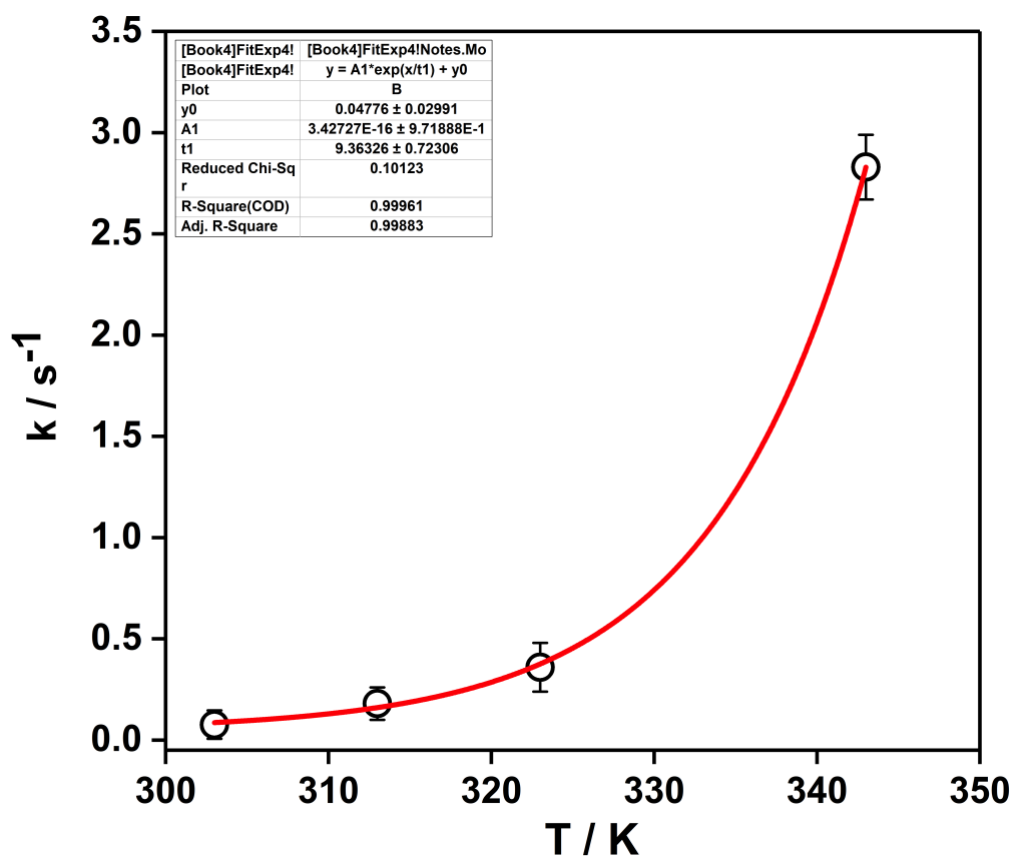

**Figure S13.** Initial rate of gas evolution (k) vs. temperature (T) in water.

< Chromatogram >

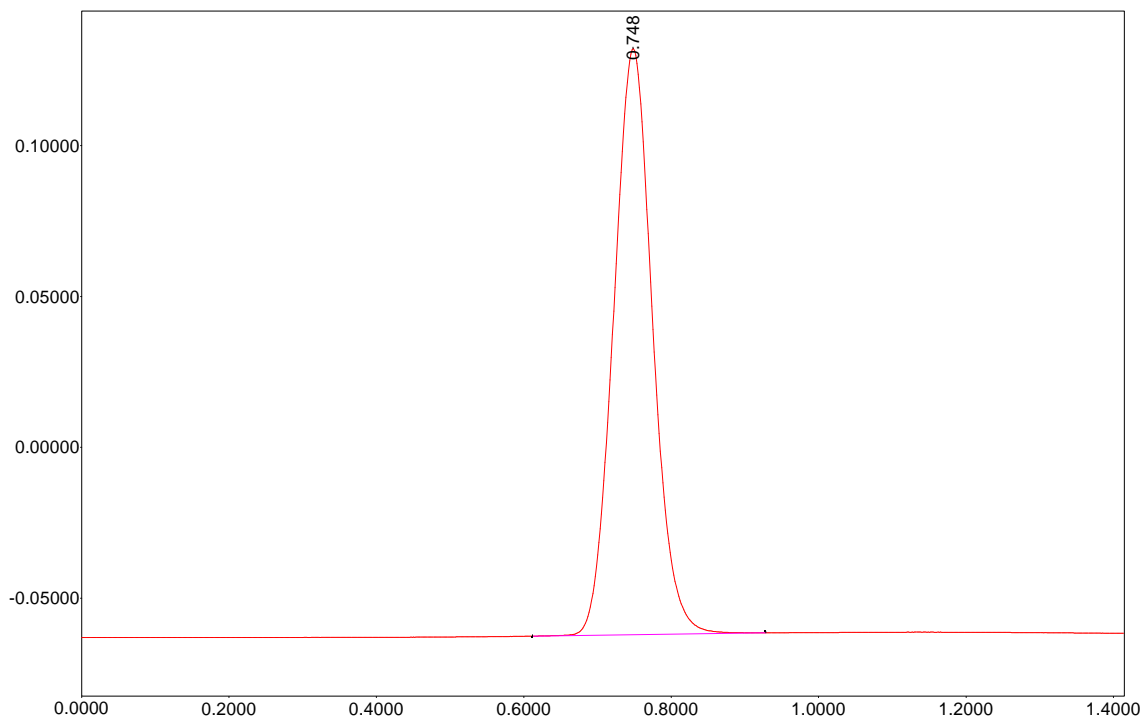

| # | RT(min) | Area(mV*sec) | Type | Width(sec) | Area%   |
|---|---------|--------------|------|------------|---------|
| 1 | 0.748   | 713.491      | BB   | 19.000     | 100.000 |

**Figure S14.** GC-TCD profile for the H<sub>2</sub> as reference (Column: Molecular sieve).

< Chromatogram >

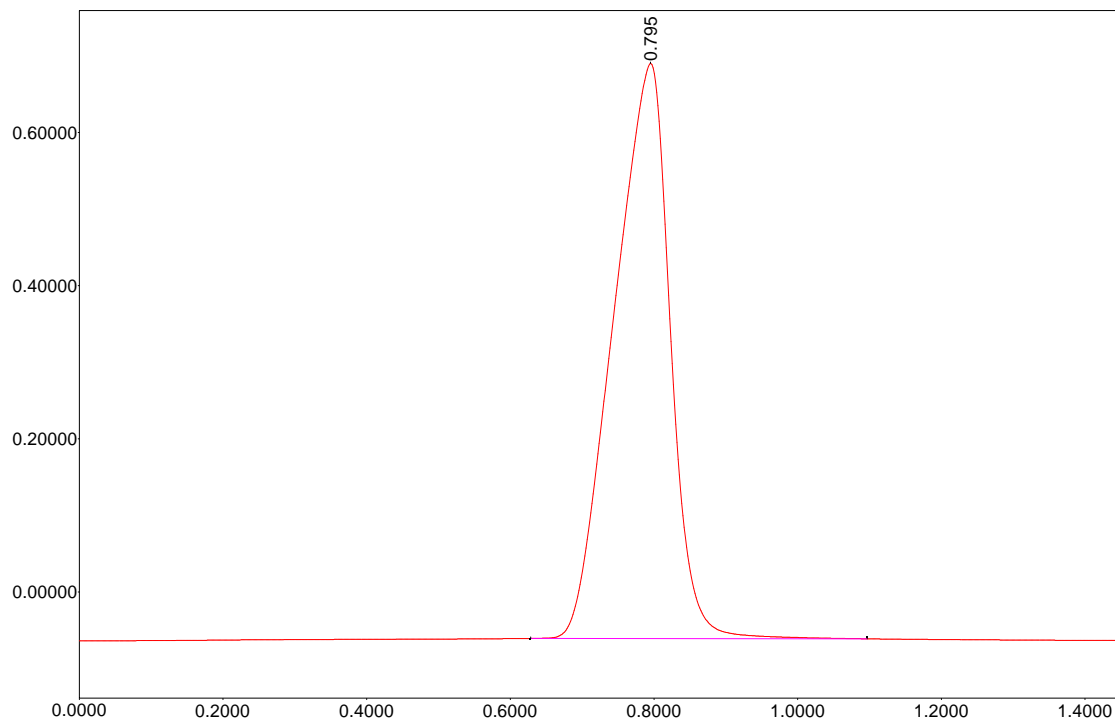

| # | RT(min) | Area(mV*sec) | Type | Width(sec) | Area%   |
|---|---------|--------------|------|------------|---------|
| 1 | 0.795   | 4092.157     | BB   | 28.100     | 100.000 |

**Figure S15.** GC-TCD profile for the dehydrogenation using 1.0 mM  $[\text{Cu}(\text{N}_3\text{Q}_3)\text{Cl}]\text{Cl}$  complex in the presence of 15 mM of formic acid and 15 mM of sodium formate for the  $\text{H}_2$  gas evolved in the sample (Column: Molecular sieve).

< Chromatogram >

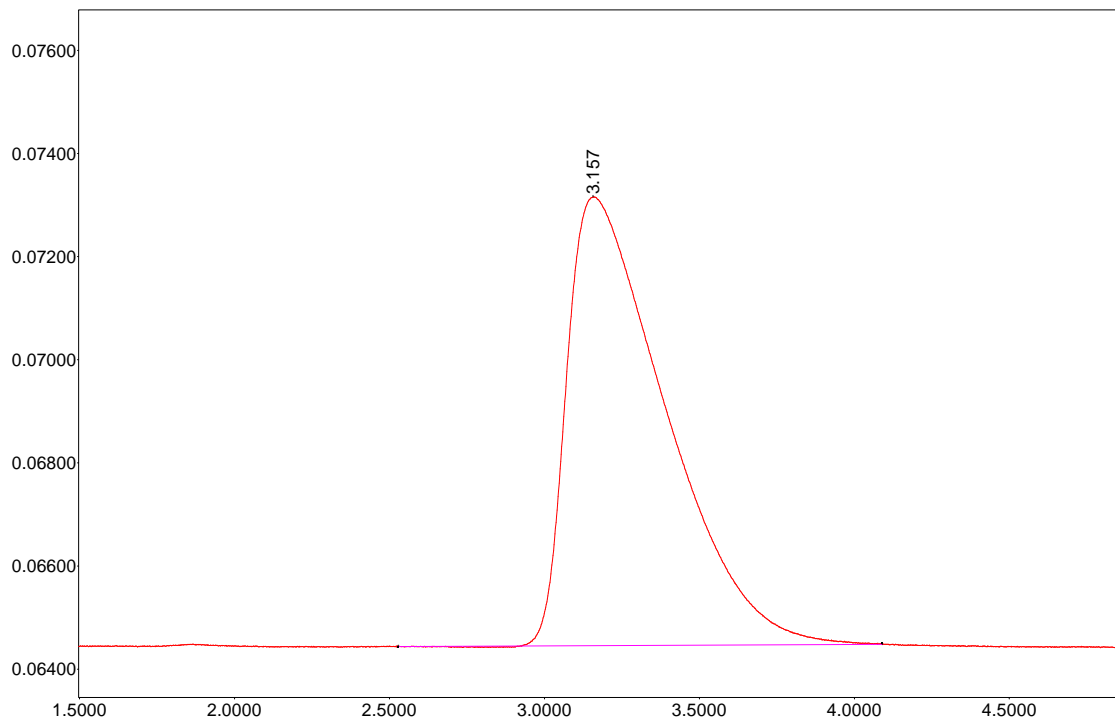

| # | RT(min) | Area(mV*sec) | Type | Width(sec) | Area%   |
|---|---------|--------------|------|------------|---------|
| 1 | 3.157   | 192.302      | BB   | 93.700     | 100.000 |

**Figure S16.** GC-TCD profile for the CO<sub>2</sub> as reference (Column: Porapak Q).

< Chromatogram >

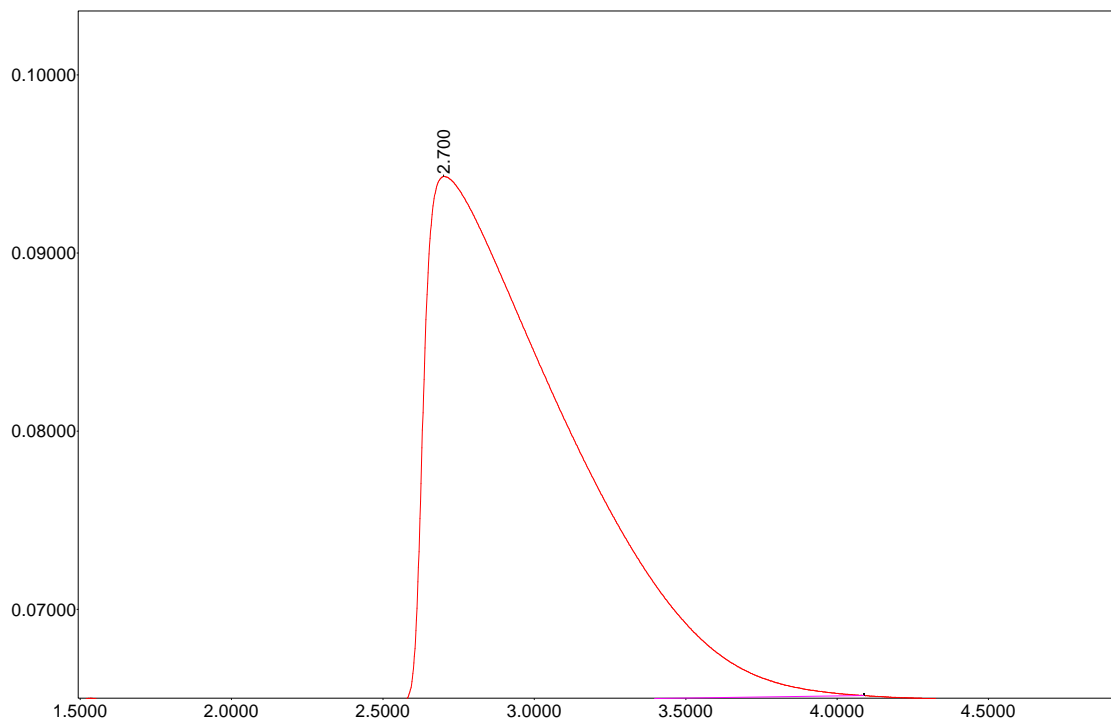

| # | RT(min) | Area(mV*sec) | Type | Width(sec) | Area%   |
|---|---------|--------------|------|------------|---------|
| 1 | 2.700   | 950.013      | BB   | 93.700     | 100.000 |

**Figure S17.** GC-TCD profile for the dehydrogenation using 1.0 mM  $[\text{Cu}(\text{N}_3\text{Q}_3)\text{Cl}]\text{Cl}$  complex in the presence of 15 mM of formic acid and 15 mM of sodium formate for the  $\text{CO}_2$  gas evolved in the sample (Column: Porapak Q).

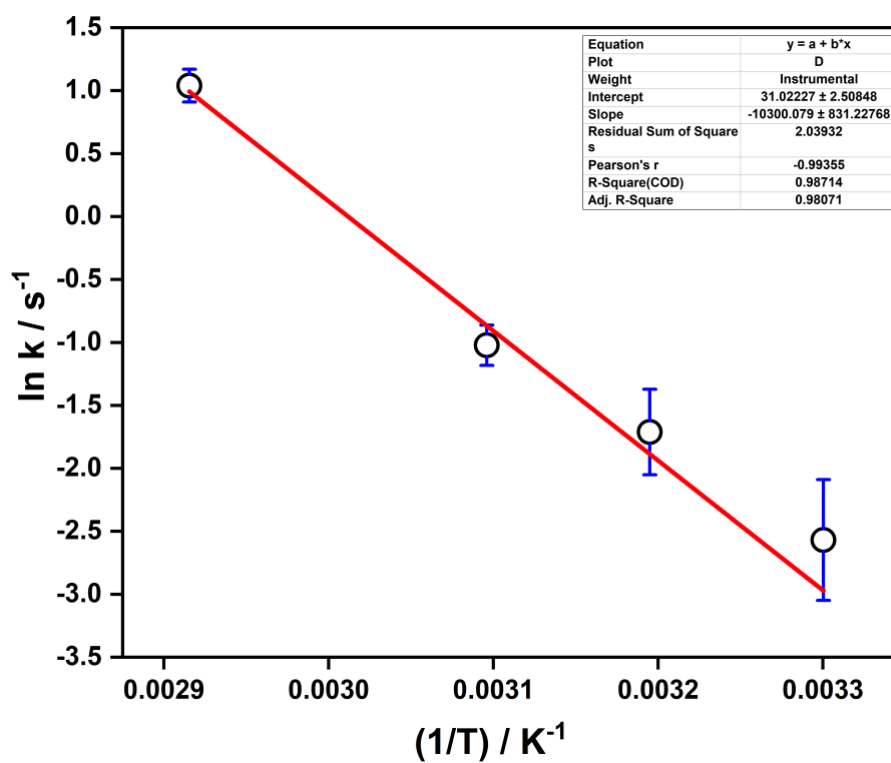

**Figure S18.** Arrhenius plot for  $[\text{Cu}(\text{N}_3\text{Q}_3)\text{Cl}]\text{Cl}$  complex to estimate the activation energy.

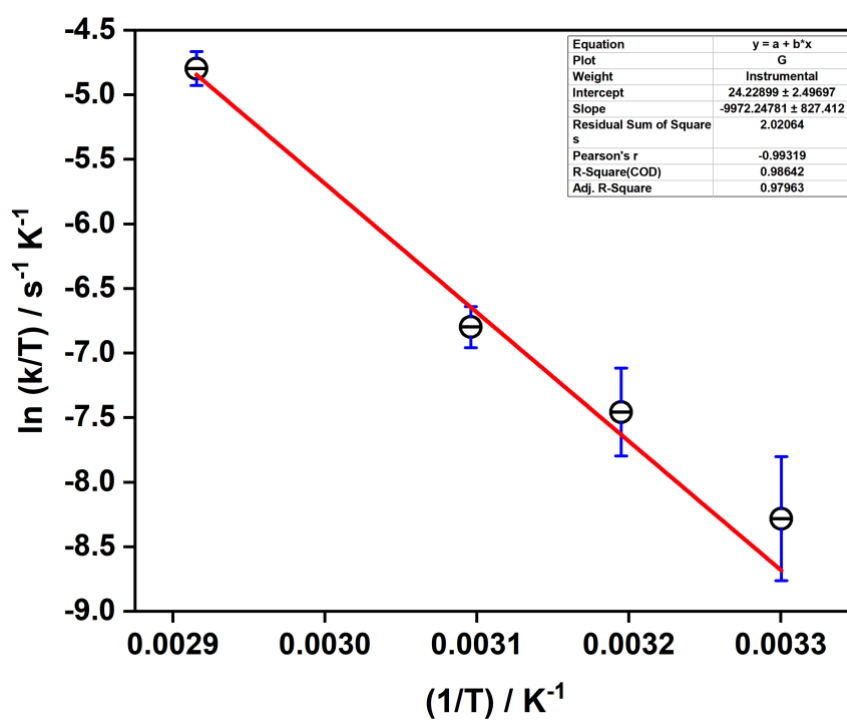

**Figure S19.** Eyring plot for  $[\text{Cu}(\text{N}_3\text{Q}_3)\text{Cl}]\text{Cl}$  complex to estimate the  $\Delta H^\ddagger$ ,  $\Delta S^\ddagger$ , and  $\Delta G^\ddagger$ .



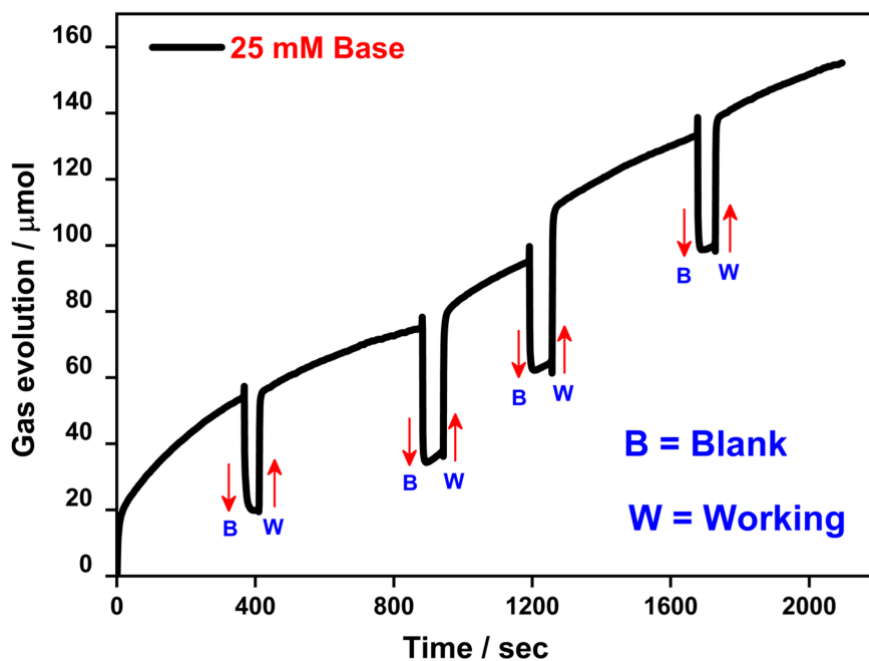

**Figure S20.** Catalytic cycles for the complex  $[\text{Cu}(\text{N}_3\text{Q}_3)\text{Cl}]\text{Cl}$  with 25 mM of the base in the presence of 1.0 mM complex and 20 mM acid in water.

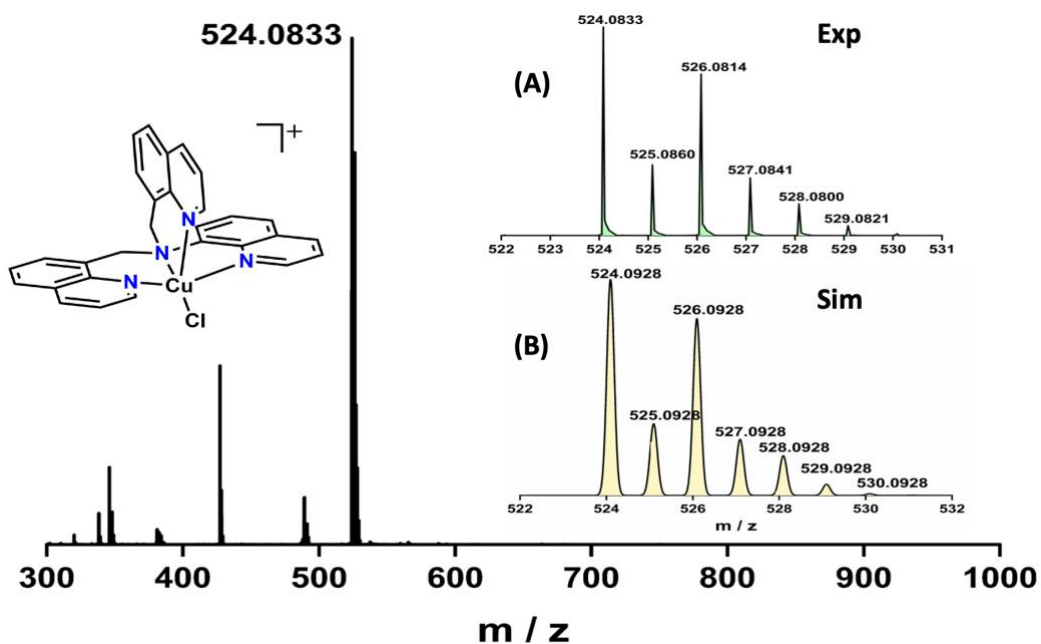

**Figure S21.** ESI Mass spectra of  $[\text{Cu}(\text{N}_3\text{Q}_3)\text{Cl}]^+$  in water.

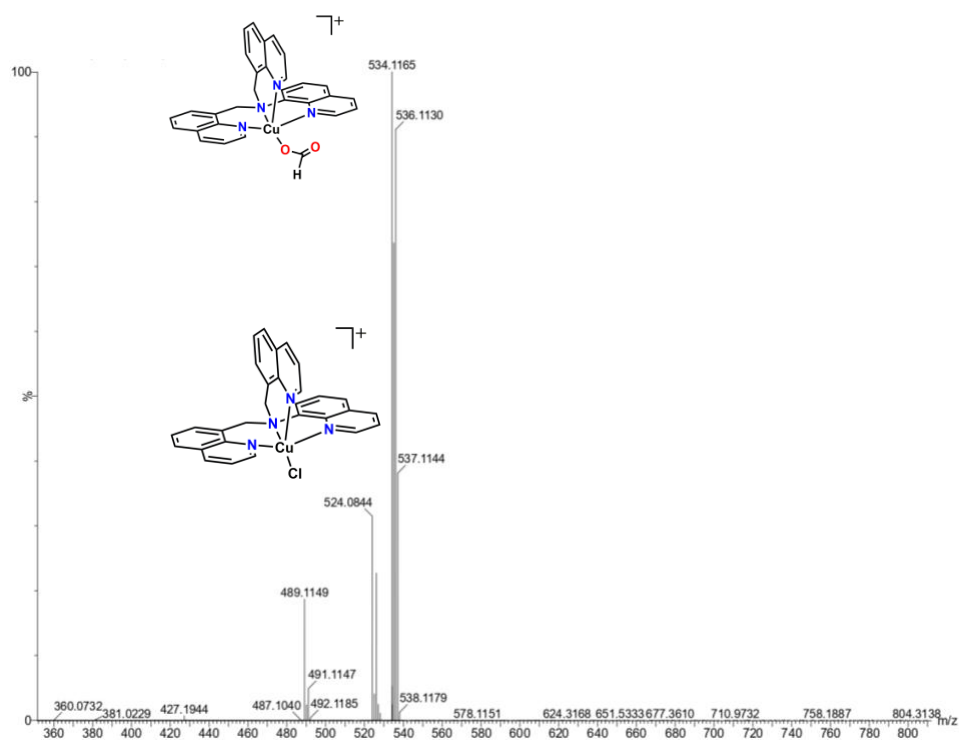

**Figure S22.** Alteration of colour of the reaction solution and Mass spectra of the reaction aliquots for the base-free catalytic dehydrogenation of formic acid in the presence of 1.0 mM complex and 50 mM acid in water.

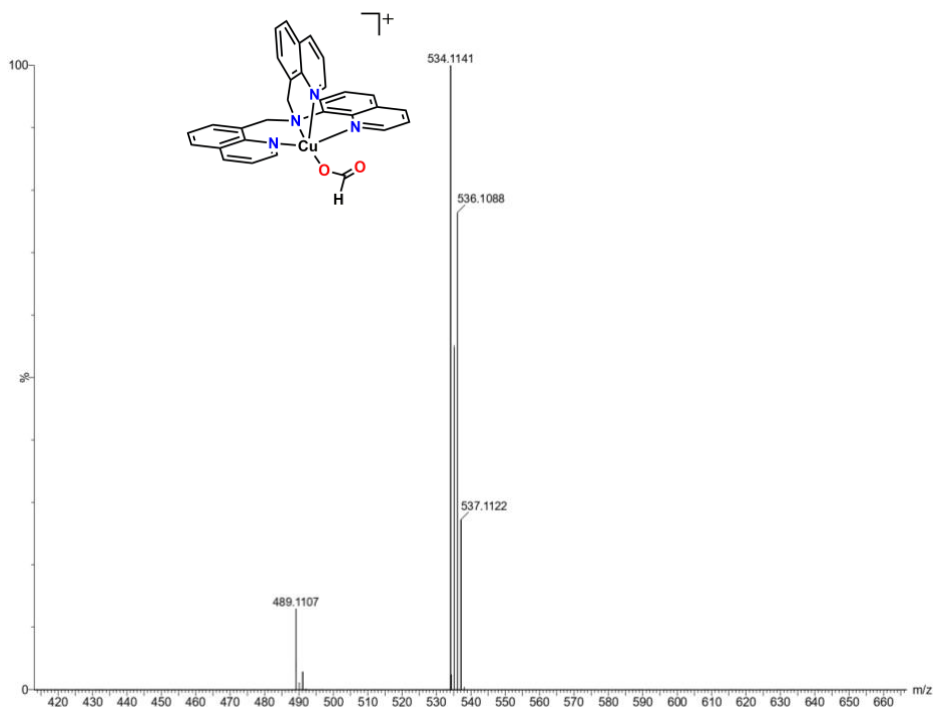

**Figure S23.** Mass spectra of the reaction aliquots for catalytic dehydrogenation of formic acid in the presence of 1.0 mM complex, 50 mM sodium formate and 50 mM formic acid in water.

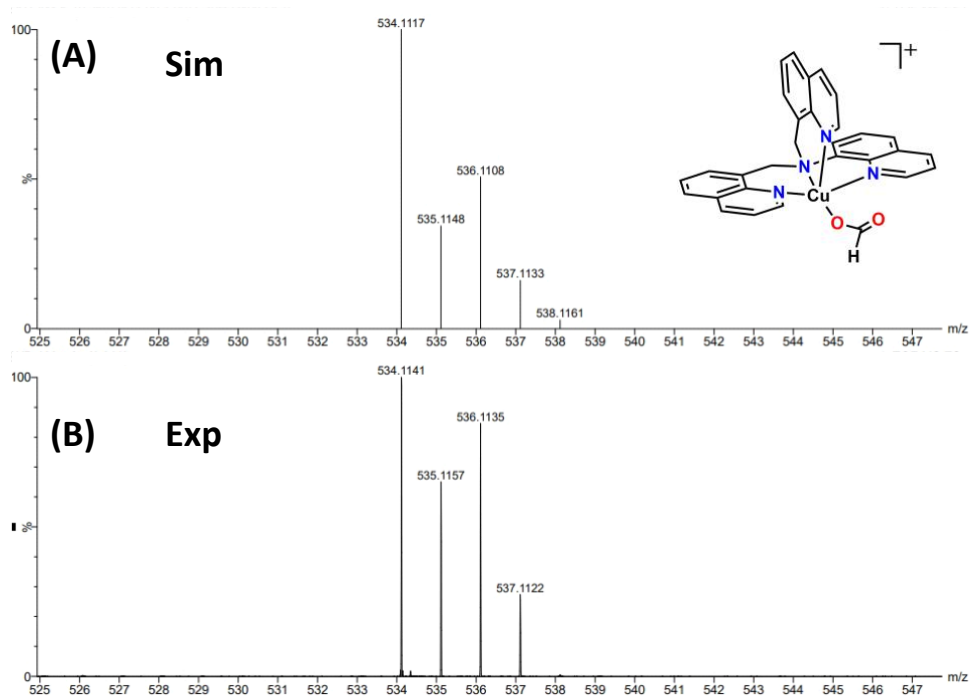

**Figure S24.** Mass spectra of  $[\text{Cu}(\text{N}_3\text{Q}_3)(\text{HCOO})]^+$  species for the reaction of  $[\text{Cu}(\text{N}_3\text{Q}_3)\text{Cl}]\text{Cl}$  (1 mM) with formic acid (50 mM) and sodium formate (50 mM) in water (1 mL) at 70 °C. ( (A) Simulated and (B) Experimental ).

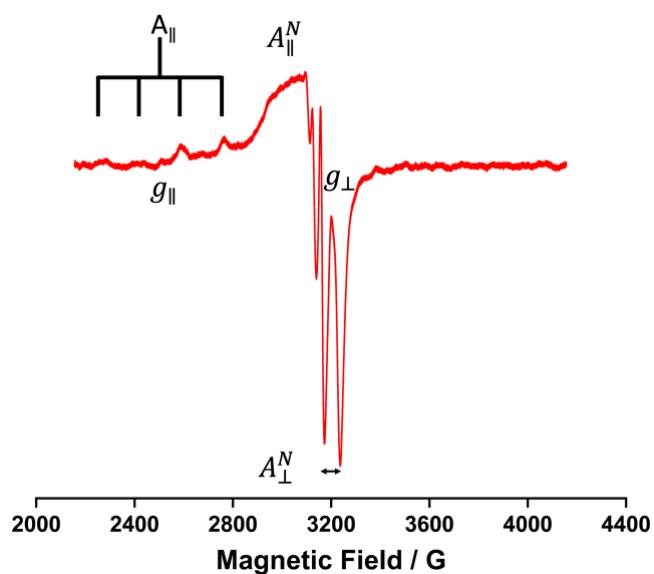

**Figure S25.** X-band EPR spectra of  $[\text{Cu}(\text{N}_3\text{Q}_3)\text{Cl}]\text{Cl}$  complex with NaH was recorded at 120 K in water.

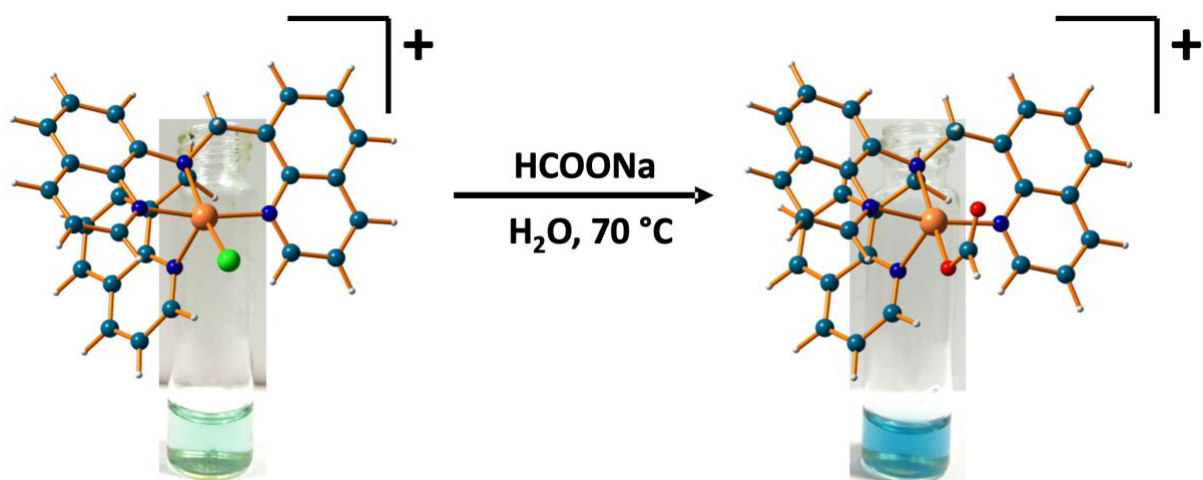

**Figure S26.** Alteration of the colour with adding HCOONa to a solution of  $[\text{Cu}(\text{N}_3\text{Q}_3)\text{Cl}]\text{Cl}$ .

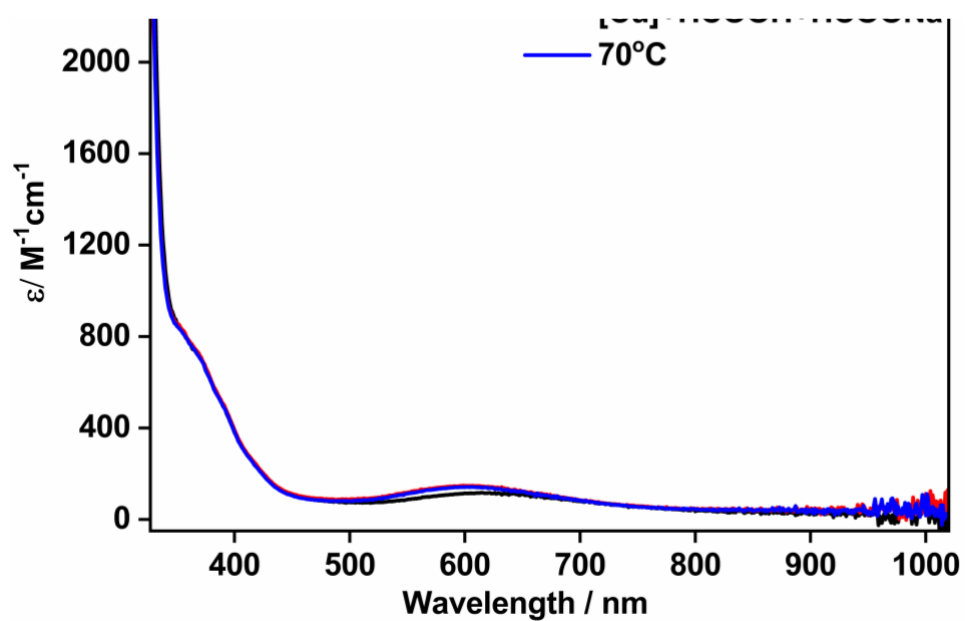

**Figure S27.** UV-Vis spectra of  $[\text{Cu}]$  Complex in water medium.

**Table S1. Crystal data and structure refinement for [Cu(N<sub>3</sub>Q<sub>3</sub>)Cl]Cl.**

|                                             |                                                                  |
|---------------------------------------------|------------------------------------------------------------------|
| Identification code                         | CCDC 2233439                                                     |
| Empirical formula                           | C <sub>29</sub> H <sub>22</sub> Cl <sub>2</sub> CuN <sub>4</sub> |
| Formula weight                              | 560.96                                                           |
| Temperature/K                               | 298                                                              |
| Crystal system                              | monoclinic                                                       |
| Space group                                 | C2/c                                                             |
| a/Å                                         | 19.874(3)                                                        |
| b/Å                                         | 18.630(2)                                                        |
| c/Å                                         | 15.830(2)                                                        |
| α/°                                         | 90                                                               |
| β/°                                         | 115.041(4)                                                       |
| γ/°                                         | 90                                                               |
| Volume/Å <sup>3</sup>                       | 5310.0(12)                                                       |
| Z                                           | 4                                                                |
| ρ <sub>calc</sub> /cm <sup>3</sup>          | 1.4033                                                           |
| μ/mm <sup>-1</sup>                          | 1.049                                                            |
| F(000)                                      | 2301.7                                                           |
| Crystal size/mm <sup>3</sup>                | 0.26 × 0.24 × 0.22                                               |
| Radiation                                   | Mo Kα (λ = 0.71073)                                              |
| 2θ range for data collection/°              | 5.56 to 49                                                       |
| Index ranges                                | -26 ≤ h ≤ 26, -24 ≤ k ≤ 24, -21 ≤ l ≤ 21                         |
| Reflections collected                       | 42267                                                            |
| Independent reflections                     | 4265 [R <sub>int</sub> = 0.0447, R <sub>sigma</sub> = 0.0288]    |
| Data/restraints/parameters                  | 4265/0/330                                                       |
| Goodness-of-fit on F <sup>2</sup>           | 1.066                                                            |
| Final R indexes [I >= 2σ (I)]               | R <sub>1</sub> = 0.0363, wR <sub>2</sub> = 0.0956                |
| Final R indexes [all data]                  | R <sub>1</sub> = 0.0408, wR <sub>2</sub> = 0.1012                |
| Largest diff. peak/hole / e Å <sup>-3</sup> | 0.84/-1.00                                                       |

**Table S2. Selected bond lengths**

| Atom | Atom | Length/Å  |
|------|------|-----------|
| Cu1  | Cl1  | 2.2873(7) |
| Cu1  | N3   | 2.050(2)  |
| Cu1  | N2   | 2.045(2)  |
| Cu1  | N4   | 2.249(2)  |
| Cu1  | N1   | 2.022(2)  |

**Table S3. Selected bond angles**

| Atom | Atom | Atom | Angle/°   |
|------|------|------|-----------|
| N3   | Cu1  | Cl1  | 90.92(6)  |
| N2   | Cu1  | Cl1  | 160.37(6) |
| N2   | Cu1  | N3   | 90.54(8)  |
| N4   | Cu1  | Cl1  | 106.82(6) |
| N4   | Cu1  | N3   | 93.30(8)  |
| N4   | Cu1  | N2   | 92.63(8)  |
| N1   | Cu1  | Cl1  | 92.00(7)  |
| N1   | Cu1  | N3   | 169.90(8) |
| N1   | Cu1  | N2   | 83.50(9)  |
| N1   | Cu1  | N4   | 95.11(8)  |

**Table S4. Calculation for Eyring plot for [Cu(N<sub>3</sub>Q<sub>3</sub>)Cl]Cl complex.**

| Temperature / °C | Slop (k) | k/T     | ln(k)  | ln(k/T) | 1/T    |
|------------------|----------|---------|--------|---------|--------|
| 30               | 0.08794  | 0.00029 | -2.43  | -8.145  | 0.0033 |
| 40               | 0.14226  | 0.00045 | -1.950 | -7.706  | 0.0031 |
| 50               | 0.15932  | 0.00049 | -1.836 | -7.621  | 0.0030 |
| 70               | 0.27604  | 0.00080 | -1.287 | -7.130  | 0.0029 |

**Table S5.** Distance (Å) between atoms present in the optimized geometry of intermediates and TS.

| <b>Bonds</b> | <b>[Cu]</b> | <b>[Cu]-A</b> | <b>[Cu]-B</b> | <b>TS1</b> | <b>[Cu]-C</b> | <b>TS2</b> |
|--------------|-------------|---------------|---------------|------------|---------------|------------|
| Cu-Cl        | 2.34        | 2.12          | 2.0           | 1.92       | 1.57          | 1.79       |
| Cu-N1        | 2.07        | 2.02          | 2.06          | 1.99       | 2.11          | 2.03       |
| Cu-N2        | 2.1         | 2.07          | 2.09          | 2.09       | 2.15          | 2.08       |
| Cu-N3        | 2.04        | 2.0           | 2.03          | 1.98       | 2.06          | 2.01       |
| Cu-N4        | 2.32        | 2.27          | 2.32          | 2.23       | 2.36          | 2.29       |

**Table S6.** Angles between atoms present in N-Cu-X; X = Cl, H<sub>2</sub>O, HCOO<sup>-</sup> and H<sup>+</sup>.

| <b>Angle</b> | <b>[Cu]<br/>X = Cl</b> | <b>[Cu]-A<br/>X = H<sub>2</sub>O</b> | <b>[Cu]-B<br/>X<br/>HCOO<sup>-</sup></b> | <b>TS1<br/>=</b> | <b>[Cu]-C<br/>X = H<sup>+</sup></b> | <b>TS2</b> |
|--------------|------------------------|--------------------------------------|------------------------------------------|------------------|-------------------------------------|------------|
| N2-Cu-X      | 163.85                 | 154.67                               | 170.8                                    | 140.05           | 170.1                               | 159.65     |
| N4-Cu-X      | 106.22                 | 114.48                               | 98.15                                    | 125.01           | 101.1                               | 108.01     |

**Table S7.** Cu 3d-orbital occupancy and energy of the complexes

|               | <b>Orbitals</b>                 | <b>Energy (in Hartree)</b> |
|---------------|---------------------------------|----------------------------|
| <b>[Cu]-B</b> | dxy                             | -0.38148                   |
|               | dxz                             | -0.33993                   |
|               | dyz                             | -0.35479                   |
|               | dx <sup>2</sup> -y <sup>2</sup> | -0.25586                   |
|               | dz <sup>2</sup>                 | -0.35568                   |
| <b>[Cu]-C</b> | dxy                             | -0.33022                   |
|               | dxz                             | -0.33333                   |
|               | dyz                             | -0.28858                   |
|               | dx <sup>2</sup> -y <sup>2</sup> | -0.28882                   |
|               | dz <sup>2</sup>                 | -0.29978                   |

**Table S8.** The relative single point energies for optimized [Cu]. The energies are reported in kcal/mol and are in relative to 6-311+G(2df,p) basis set.

| <b>Basis Set</b> | <b>Single point energy (kcal/mol)</b> |
|------------------|---------------------------------------|
| 6-311+G(2df,p)   | 0                                     |
| 6-311+G(d)       | 69.6                                  |
| 6-311+G(d,p)     | 48.0                                  |
| 6-311+G(2d,p)    | 25.9                                  |
| 6-311+G(df,p)    | 16.6                                  |

**Table S9.** The relative single point energies for optimized [Cu]. The energies are reported in kcal/mol and are in relative to B3LYP-D3 functional.

| <b>Functional</b> | <b>Single point energy (kcal/mol)</b> |
|-------------------|---------------------------------------|
| B3LYP             | 54.6                                  |
| B3LYP-D3          | 0                                     |
| B3LYP-D3BJ [15]   | -56.9                                 |



**Cartesian coordinates, imaginary vibrational modes for transition states,  
and Gibbs free energies for the key structures involved in this study.**

**[Cu(N<sub>3</sub>Q<sub>3</sub>)Cl]Cl optimized structure:**

[Cu]

|    |             |             |             |
|----|-------------|-------------|-------------|
| Cu | -0.38504300 | 0.53775200  | 1.01927900  |
| Cl | -0.72828900 | 2.12393700  | 2.70563400  |
| N  | -2.32909100 | 0.69103600  | 0.33925400  |
| N  | -0.18899400 | -1.25593100 | -0.04917100 |
| N  | 0.60050300  | 1.67056400  | -0.74297100 |
| N  | 1.47947600  | 0.03111400  | 1.68914700  |
| C  | -3.57244300 | -2.71420600 | -0.28918600 |
| H  | -3.21724500 | -3.73844700 | -0.28499000 |
| C  | -4.93823800 | 1.24570800  | -0.49609900 |
| H  | -5.95491800 | 1.45221200  | -0.81060600 |
| C  | 0.94463400  | 2.90868800  | -0.43295200 |
| H  | 0.39554800  | 3.36325600  | 0.38525600  |
| C  | -0.30888600 | -0.98385600 | -1.52447100 |
| H  | -0.49057500 | -1.92612700 | -2.04744600 |
| H  | -1.18653400 | -0.35517800 | -1.65863600 |
| C  | -1.30581200 | -2.10602700 | 0.48223600  |
| H  | -1.14658200 | -3.13985300 | 0.16876300  |
| H  | -1.21583700 | -2.08507300 | 1.57188500  |
| C  | -4.91201500 | -2.46409200 | -0.65167400 |
| H  | -5.56048500 | -3.29360000 | -0.90497300 |
| C  | 1.97987400  | 3.61864900  | -1.07266400 |
| H  | 2.20348000  | 4.63288200  | -0.76835500 |
| C  | 2.69585800  | 2.98497000  | -2.05706000 |
| H  | 3.51532300  | 3.48382800  | -2.56256400 |
| C  | -3.16390200 | -0.35607700 | 0.02929700  |
| C  | 0.89768600  | -0.30076100 | -2.11923200 |
| C  | -5.37365100 | -1.17441200 | -0.70312500 |
| H  | -6.39211200 | -0.95572300 | -1.00219100 |

|   |             |             |             |
|---|-------------|-------------|-------------|
| C | 3.55391800  | 0.30204800  | 2.85588800  |
| H | 4.14561200  | 0.91744900  | 3.52024500  |
| C | -4.50979200 | -0.09721300 | -0.38506900 |
| C | -2.76337800 | 1.93612900  | 0.19812200  |
| H | -2.06079700 | 2.71850000  | 0.44524800  |
| C | 1.61801200  | -0.94294500 | -3.10500700 |
| H | 1.33734700  | -1.94950700 | -3.39365300 |
| C | 1.27555000  | 1.02493500  | -1.74393400 |
| C | 3.07129100  | 0.95464600  | -3.43010500 |
| H | 3.89718700  | 1.44684900  | -3.93125000 |
| C | 2.36395600  | 1.65745800  | -2.42190000 |
| C | -2.69833500 | -1.70278800 | 0.05915200  |
| C | 1.09677600  | -1.86053600 | 0.28395400  |
| C | 4.03287700  | -0.88541400 | 2.35886800  |
| H | 5.02211400  | -1.24210600 | 2.62183300  |
| C | 3.63370600  | -2.88840600 | 0.92207200  |
| H | 4.61507500  | -3.27839100 | 1.16500600  |
| C | 2.70675300  | -0.32605100 | -3.76052700 |
| H | 3.24359200  | -0.87000200 | -4.52818400 |
| C | -4.06106100 | 2.26373200  | -0.22357900 |
| H | -4.34280100 | 3.30395400  | -0.31584800 |
| C | 1.93544700  | -1.14663600 | 1.16677800  |
| C | 3.22488400  | -1.65595600 | 1.48783100  |
| C | 1.51914600  | -3.05707200 | -0.24677600 |
| H | 0.88420000  | -3.60875800 | -0.92876500 |
| C | 2.25942800  | 0.72744700  | 2.49746800  |
| H | 1.84227900  | 1.64942400  | 2.87950500  |
| C | 2.79357900  | -3.57350900 | 0.07643100  |
| H | 3.10483500  | -4.51552500 | -0.35737300 |

**[Cu]-A**

|    |            |            |             |
|----|------------|------------|-------------|
| Cu | 0.38616700 | 0.31431800 | -1.10977500 |
|----|------------|------------|-------------|

|   |             |             |             |
|---|-------------|-------------|-------------|
| N | 2.31572400  | 0.63017900  | -0.62250800 |
| N | 0.21333900  | -1.23638400 | 0.25002400  |
| N | -0.49295900 | 1.84064200  | 0.32237600  |
| N | -1.47897700 | -0.20780700 | -1.62777800 |
| C | 3.62970600  | -2.47388900 | 0.85194700  |
| H | 3.29942700  | -3.47242200 | 1.11399700  |
| C | 4.92173600  | 1.41915000  | -0.02382400 |
| H | 5.93772800  | 1.71676000  | 0.20832300  |
| C | -0.76725800 | 3.02231000  | -0.20665000 |
| H | -0.17382400 | 3.31605400  | -1.06611600 |
| C | 0.28842600  | -0.65454400 | 1.63682900  |
| H | 0.42663500  | -1.46970600 | 2.35109100  |
| H | 1.17932500  | -0.02960200 | 1.66784700  |
| C | 1.35844700  | -2.15051400 | -0.06608300 |
| H | 1.22909300  | -3.08757600 | 0.47863300  |
| H | 1.27870200  | -2.38199200 | -1.13137800 |
| C | 4.96285400  | -2.10792600 | 1.13141700  |
| H | 5.62795600  | -2.82807000 | 1.59125500  |
| C | -1.78882400 | 3.87296700  | 0.25491400  |
| H | -1.95173800 | 4.82737900  | -0.22789600 |
| C | -2.57173200 | 3.44434600  | 1.29721400  |
| H | -3.38769200 | 4.05329600  | 1.66995500  |
| C | 3.16985100  | -0.29096500 | -0.06469600 |
| C | -0.92197100 | 0.15971500  | 2.02179100  |
| C | 5.39981200  | -0.84379500 | 0.83381800  |
| H | 6.41557400  | -0.53601400 | 1.05206000  |
| C | -3.58106400 | -0.06399800 | -2.76202800 |
| H | -4.19174800 | 0.47125100  | -3.47614300 |
| C | 4.51360200  | 0.09340200  | 0.24667400  |
| C | 2.73189200  | 1.87265100  | -0.83977700 |
| H | 2.00943900  | 2.56221700  | -1.25748600 |
| C | -1.71627100 | -0.27375800 | 3.06349200  |

|   |             |             |             |
|---|-------------|-------------|-------------|
| H | -1.48975800 | -1.22029800 | 3.54044800  |
| C | -1.22939400 | 1.40654200  | 1.39516100  |
| C | -3.09790500 | 1.69969200  | 2.97497200  |
| H | -3.92144200 | 2.30285000  | 3.33968700  |
| C | -2.31515700 | 2.18851000  | 1.89854000  |
| C | 2.73290900  | -1.61002600 | 0.25452500  |
| C | -1.06564500 | -1.89864900 | 0.00729800  |
| C | -4.04226500 | -1.18741200 | -2.11723800 |
| H | -5.03688800 | -1.57093000 | -2.31254800 |
| C | -3.61010200 | -3.00040600 | -0.45184600 |
| H | -4.59391900 | -3.41940800 | -0.62570100 |
| C | -2.80864400 | 0.48371300  | 3.53979900  |
| H | -3.40501000 | 0.10177500  | 4.35922200  |
| C | 4.03096900  | 2.31486600  | -0.56045200 |
| H | 4.30095700  | 3.34104700  | -0.76813400 |
| C | -1.92012700 | -1.31015900 | -0.95013500 |
| C | -3.21524200 | -1.84983300 | -1.17840200 |
| C | -1.47769300 | -3.01082900 | 0.70179700  |
| H | -0.83664400 | -3.45924300 | 1.45081500  |
| C | -2.28129800 | 0.39880000  | -2.48724800 |
| H | -1.89317000 | 1.28446900  | -2.97539400 |
| C | -2.75497600 | -3.56748900 | 0.46312400  |
| H | -3.05760600 | -4.44392500 | 1.02201100  |
| O | 0.71968300  | 1.15124800  | -3.02634200 |
| H | 1.64008900  | 1.25807700  | -3.30277300 |
| H | 0.29049700  | 0.67758400  | -3.75196200 |

**[Cu]-B**

|    |             |             |             |
|----|-------------|-------------|-------------|
| Cu | 0.38379100  | 0.81275500  | -0.62120400 |
| N  | 2.34355000  | 0.69696600  | 0.01169100  |
| N  | 0.11748600  | -1.23162000 | -0.29945300 |
| N  | -0.62144400 | 1.25036900  | 1.41986400  |

|   |             |             |             |
|---|-------------|-------------|-------------|
| N | -1.44213900 | 0.65739600  | -1.49814100 |
| C | 3.43300300  | -2.79750700 | -0.33978500 |
| H | 3.04813300  | -3.75390600 | -0.67490900 |
| C | 4.93030400  | 0.86583500  | 1.05678800  |
| H | 5.93502300  | 0.92341700  | 1.45984500  |
| C | -0.90852600 | 2.53053100  | 1.58304000  |
| H | -0.29343800 | 3.22888500  | 1.02607700  |
| C | 0.16349700  | -1.52927100 | 1.17525600  |
| H | 0.30349400  | -2.60354000 | 1.31893000  |
| H | 1.04439800  | -1.02331300 | 1.56701400  |
| C | 1.25759400  | -1.85843800 | -1.05026600 |
| H | 1.07071300  | -2.92858400 | -1.15855500 |
| H | 1.23857100  | -1.42348400 | -2.05346700 |
| C | 4.74981000  | -2.73534500 | 0.16250900  |
| H | 5.35004000  | -3.63598800 | 0.19948600  |
| C | -1.96644700 | 2.99879900  | 2.38820100  |
| H | -2.14233100 | 4.06289100  | 2.47845900  |
| C | -2.76438600 | 2.07903500  | 3.02174800  |
| H | -3.60236500 | 2.39294300  | 3.63435400  |
| C | 3.12455400  | -0.43278800 | 0.03786100  |
| C | -1.06130500 | -1.07237800 | 1.92756100  |
| C | 5.25334500  | -1.54114100 | 0.60878400  |
| H | 6.25867100  | -1.47179800 | 1.00769800  |
| C | -3.43396000 | 1.42003000  | -2.58088900 |
| H | -3.97925700 | 2.25866000  | -2.99264800 |
| C | 4.45264300  | -0.37223600 | 0.56790700  |
| C | 2.82534600  | 1.83638500  | 0.49029200  |
| H | 2.16444800  | 2.69023700  | 0.43808100  |
| C | -1.86042800 | -2.00396700 | 2.55691400  |
| H | -1.62500900 | -3.05734900 | 2.45640300  |
| C | -1.38025200 | 0.31279800  | 2.06567600  |
| C | -3.28419300 | -0.29985300 | 3.50237900  |

|   |             |             |             |
|---|-------------|-------------|-------------|
| H | -4.12922600 | 0.00556700  | 4.10910600  |
| C | -2.49397000 | 0.69651800  | 2.87497900  |
| C | 2.62014400  | -1.68424900 | -0.42350100 |
| C | -1.15498700 | -1.63118900 | -0.89503700 |
| C | -3.95394300 | 0.14787400  | -2.59609900 |
| H | -4.92938400 | -0.04954400 | -3.02564200 |
| C | -3.66341400 | -2.26372900 | -2.00162300 |
| H | -4.63163200 | -2.50507800 | -2.42407900 |
| C | -2.97450500 | -1.62679000 | 3.33994400  |
| H | -3.57516700 | -2.39309000 | 3.81472500  |
| C | 4.11697400  | 1.96952700  | 1.02350300  |
| H | 4.44207900  | 2.93190000  | 1.39533200  |
| C | -1.93739800 | -0.61389500 | -1.48581100 |
| C | -3.21023900 | -0.92217500 | -2.04044600 |
| C | -1.62168700 | -2.92450000 | -0.87303600 |
| H | -1.03566700 | -3.71207200 | -0.41592900 |
| C | -2.16004800 | 1.63565100  | -2.01831900 |
| H | -1.71166300 | 2.62006000  | -1.98682200 |
| C | -2.88090100 | -3.24044100 | -1.43184700 |
| H | -3.22686900 | -4.26601700 | -1.39987500 |
| O | 0.60233000  | 2.69782300  | -1.23902800 |
| C | 1.13845200  | 2.78531800  | -2.40679100 |
| H | 1.27293000  | 3.82639200  | -2.75416200 |
| O | 1.48653700  | 1.84351100  | -3.12117200 |

**[Cu]-C**

|    |             |             |             |
|----|-------------|-------------|-------------|
| Cu | 0.39136900  | 0.34985100  | -1.35576000 |
| N  | 2.47173700  | 0.49478600  | -1.01970500 |
| N  | 0.20712300  | -1.10755300 | 0.22064600  |
| N  | -0.42700200 | 1.94820900  | 0.17646500  |
| N  | -1.51164700 | -0.32540100 | -1.77131800 |
| C  | 3.49911700  | -2.29533000 | 1.14113200  |

|   |             |             |             |
|---|-------------|-------------|-------------|
| H | 3.09600900  | -3.21465100 | 1.55054000  |
| C | 5.09828000  | 1.25983100  | -0.41739200 |
| H | 6.11336500  | 1.55260700  | -0.17362200 |
| C | -0.69787900 | 3.09045900  | -0.42938400 |
| H | -0.07908600 | 3.32889900  | -1.28806700 |
| C | 0.33008600  | -0.45513900 | 1.56733400  |
| H | 0.50624300  | -1.21615200 | 2.33327600  |
| H | 1.21192700  | 0.18328700  | 1.52194600  |
| C | 1.33704100  | -2.05653900 | -0.04971900 |
| H | 1.17896600  | -2.98487800 | 0.50414000  |
| H | 1.28891800  | -2.30169400 | -1.11452100 |
| C | 4.82003400  | -1.92630300 | 1.47479800  |
| H | 5.40240000  | -2.56166800 | 2.13078200  |
| C | -1.73904900 | 3.95863000  | -0.04050600 |
| H | -1.90119900 | 4.88062500  | -0.58397000 |
| C | -2.53773500 | 3.59302800  | 1.01454300  |
| H | -3.36285500 | 4.21946000  | 1.33542100  |
| C | 3.23759300  | -0.31527200 | -0.21756700 |
| C | -0.87242100 | 0.37091800  | 1.94669500  |
| C | 5.35405000  | -0.77050800 | 0.96704700  |
| H | 6.36723800  | -0.46929800 | 1.20722400  |
| C | -3.60742400 | -0.37808800 | -2.93039200 |
| H | -4.21962100 | 0.03834600  | -3.71936300 |
| C | 4.57881800  | 0.05724500  | 0.11602600  |
| C | 3.00173600  | 1.61008700  | -1.50382300 |
| H | 2.35276800  | 2.19897000  | -2.13924600 |
| C | -1.66141000 | -0.00576100 | 3.01328500  |
| H | -1.43081000 | -0.92246200 | 3.54417700  |
| C | -1.18420300 | 1.57904500  | 1.25339200  |
| C | -3.06463900 | 1.94780500  | 2.79931500  |
| H | -3.89826000 | 2.56082100  | 3.12336000  |
| C | -2.28132200 | 2.37969800  | 1.69882600  |

|   |             |             |             |
|---|-------------|-------------|-------------|
| C | 2.70690100  | -1.53189100 | 0.30694900  |
| C | -1.07246200 | -1.78780400 | 0.06880700  |
| C | -4.06235800 | -1.39897700 | -2.13113700 |
| H | -5.05205200 | -1.81825000 | -2.27206400 |
| C | -3.61485000 | -2.96623200 | -0.23941600 |
| H | -4.59533400 | -3.41318300 | -0.35578800 |
| C | -2.76098900 | 0.77279800  | 3.44062500  |
| H | -3.35593100 | 0.43725700  | 4.28155200  |
| C | 4.31347800  | 2.03436100  | -1.23288400 |
| H | 4.67425300  | 2.95895700  | -1.66377300 |
| C | -1.94036600 | -1.33022800 | -0.95332600 |
| C | -3.22981400 | -1.91493200 | -1.10734200 |
| C | -1.47730600 | -2.81453400 | 0.89073200  |
| H | -0.82506800 | -3.17061600 | 1.67877300  |
| C | -2.30973100 | 0.13061900  | -2.71839100 |
| H | -1.90709200 | 0.92562800  | -3.33411800 |
| C | -2.75064100 | -3.40713500 | 0.73470900  |
| H | -3.04245100 | -4.21086100 | 1.39942800  |
| H | 0.47127900  | 1.20377500  | -2.66927800 |

### **TS1**

|    |             |             |             |
|----|-------------|-------------|-------------|
| Cu | 0.39166200  | 0.68011900  | -0.51981000 |
| O  | 0.60886000  | 3.84004200  | -0.76445100 |
| N  | 2.31944300  | 0.59257100  | -0.04702400 |
| N  | 0.11837800  | -1.38921300 | -0.48349800 |
| N  | -0.45380200 | 1.00134800  | 1.51360900  |
| N  | -1.44347500 | 0.71677700  | -1.26963200 |
| C  | 3.45776800  | -2.86595500 | -0.61311300 |
| H  | 3.08754000  | -3.80925500 | -0.99764700 |
| C  | 4.92395000  | 0.74878300  | 0.92868500  |
| H  | 5.93723000  | 0.79896500  | 1.31034900  |
| C  | -0.63255200 | 2.26764400  | 1.85931700  |



|   |             |             |             |
|---|-------------|-------------|-------------|
| H | 0.00449600  | 2.99283100  | 1.36612100  |
| C | 0.13628100  | -1.81976200 | 0.95491700  |
| H | 0.19489700  | -2.91060900 | 0.99897500  |
| H | 1.05302700  | -1.42106400 | 1.38879100  |
| C | 1.26330300  | -1.93849700 | -1.27236900 |
| H | 1.10657000  | -3.00497800 | -1.44935200 |
| H | 1.23427900  | -1.43774000 | -2.24367500 |
| C | 4.77808700  | -2.80815800 | -0.12119800 |
| H | 5.39291300  | -3.69935900 | -0.13617700 |
| C | -1.62224700 | 2.69634800  | 2.76406300  |
| H | -1.70813700 | 3.74800500  | 3.00377200  |
| C | -2.47716000 | 1.76167000  | 3.29053000  |
| H | -3.27415000 | 2.05056300  | 3.96652500  |
| C | 3.10987400  | -0.53235100 | -0.10559100 |
| C | -1.05230500 | -1.34376900 | 1.75364200  |
| C | 5.26815800  | -1.62873100 | 0.37457300  |
| H | 6.27846400  | -1.55970700 | 0.76020900  |
| C | -3.48211800 | 1.67933300  | -2.06673800 |
| H | -4.04182600 | 2.58265200  | -2.26741300 |
| C | 4.44805300  | -0.47302900 | 0.40027500  |
| C | 2.79990000  | 1.72226500  | 0.46274900  |
| H | 2.13032700  | 2.57403800  | 0.46704200  |
| C | -1.92191600 | -2.27963900 | 2.27590400  |
| H | -1.76934600 | -3.32718100 | 2.04272800  |
| C | -1.26065500 | 0.03587000  | 2.06277300  |
| C | -3.18550700 | -0.60507200 | 3.46196700  |
| H | -3.99054300 | -0.31194100 | 4.12623000  |
| C | -2.32308400 | 0.39620600  | 2.94844200  |
| C | 2.62203700  | -1.76628700 | -0.63143500 |
| C | -1.16100300 | -1.65674800 | -1.12801500 |
| C | -4.00547700 | 0.43452100  | -2.32514300 |
| H | -4.99919900 | 0.32595700  | -2.74382700 |

|   |             |             |             |
|---|-------------|-------------|-------------|
| C | -3.71046600 | -2.04534500 | -2.24838900 |
| H | -4.69622500 | -2.19238500 | -2.67319400 |
| C | -2.99479600 | -1.91972400 | 3.12004000  |
| H | -3.65249000 | -2.68970300 | 3.50426000  |
| C | 4.10407300  | 1.84839900  | 0.95855400  |
| H | 4.43174300  | 2.79926400  | 1.35587900  |
| C | -1.94775600 | -0.53732400 | -1.48410600 |
| C | -3.24510700 | -0.72399900 | -2.03472300 |
| C | -1.64235000 | -2.92634300 | -1.34238800 |
| H | -1.05317000 | -3.78917000 | -1.05788000 |
| C | -2.18387900 | 1.78073700  | -1.53487800 |
| H | -1.73973100 | 2.74456900  | -1.31975900 |
| C | -2.92088200 | -3.11963400 | -1.91356600 |
| H | -3.27770200 | -4.12931500 | -2.07326500 |
| C | 0.78389200  | 3.24493600  | -1.84152600 |
| O | 0.86070400  | 3.61671700  | -3.01417600 |
| H | 0.89580800  | 2.07960000  | -1.73887900 |

## TS2

|    |             |             |             |
|----|-------------|-------------|-------------|
| Cu | 0.31798900  | -0.19300600 | -0.94628300 |
| N  | 2.16508200  | 0.56374000  | -0.57755600 |
| N  | -0.03164100 | -0.57337200 | 1.06749700  |
| N  | -0.86300600 | 1.76212200  | -0.84492200 |
| N  | -1.38863600 | -1.21726100 | -1.21331100 |
| C  | 3.25695700  | -0.73703400 | 2.68480200  |
| H  | 2.90425400  | -1.38514700 | 3.47882800  |
| C  | 4.64515500  | 1.81792900  | -0.34081500 |
| H  | 5.60897900  | 2.30340600  | -0.23902000 |
| C  | -1.10909900 | 2.31037200  | -2.02368700 |
| H  | -0.39474000 | 2.09732400  | -2.81191700 |
| C  | -0.18061700 | 0.73311500  | 1.79502200  |
| H  | -0.11007200 | 0.55503300  | 2.87081800  |

|   |             |             |             |
|---|-------------|-------------|-------------|
| H | 0.66730300  | 1.35143600  | 1.50370100  |
| C | 1.18094800  | -1.35023100 | 1.48753000  |
| H | 0.99736800  | -1.80266800 | 2.46403800  |
| H | 1.29148800  | -2.15842700 | 0.75859300  |
| C | 4.51690200  | -0.11851500 | 2.82541600  |
| H | 5.10409700  | -0.30119000 | 3.71682000  |
| C | -2.23446900 | 3.10989300  | -2.30023400 |
| H | -2.36710100 | 3.52658300  | -3.28998000 |
| C | -3.14916600 | 3.31728300  | -1.29843200 |
| H | -4.04238200 | 3.90738800  | -1.47074700 |
| C | 2.92679400  | 0.31264400  | 0.53695200  |
| C | -1.46877300 | 1.45312600  | 1.48267100  |
| C | 4.98385400  | 0.71003700  | 1.83861900  |
| H | 5.94692400  | 1.19907900  | 1.92660400  |
| C | -3.21564200 | -2.17916600 | -2.41956900 |
| H | -3.68364000 | -2.34239500 | -3.38089700 |
| C | 4.20016500  | 0.94937200  | 0.68232600  |
| C | 2.61948600  | 1.38183500  | -1.51618200 |
| H | 1.98293100  | 1.53048200  | -2.37852600 |
| C | -2.38675100 | 1.66164400  | 2.49112100  |
| H | -2.18886100 | 1.25684600  | 3.47703300  |
| C | -1.73828300 | 1.98788700  | 0.18562600  |
| C | -3.83787000 | 2.94284000  | 1.05277200  |
| H | -4.73772000 | 3.52232200  | 0.88028500  |
| C | -2.92643700 | 2.75666800  | -0.01746300 |
| C | 2.46218900  | -0.55439500 | 1.57023400  |
| C | -1.23313900 | -1.39665000 | 1.16250100  |
| C | -3.76739200 | -2.66647300 | -1.25848300 |
| H | -4.69200900 | -3.23174600 | -1.27759600 |
| C | -3.61346100 | -2.89415500 | 1.22682700  |
| H | -4.53293000 | -3.46681100 | 1.25046100  |
| C | -3.57451900 | 2.39720500  | 2.28353000  |

|   |             |             |             |
|---|-------------|-------------|-------------|
| H | -4.26720800 | 2.53316000  | 3.10508300  |
| C | 3.85678800  | 2.03710200  | -1.44145800 |
| H | 4.16149600  | 2.69336400  | -2.24521500 |
| C | -1.91587400 | -1.68074100 | -0.04152000 |
| C | -3.12362100 | -2.43058700 | -0.01917700 |
| C | -1.73106700 | -1.86368800 | 2.35578800  |
| H | -1.21966300 | -1.64762200 | 3.28558600  |
| C | -2.00980100 | -1.45512800 | -2.35494000 |
| H | -1.54115100 | -1.06374700 | -3.24926200 |
| C | -2.92640200 | -2.61780800 | 2.38531700  |
| H | -3.29997500 | -2.97220800 | 3.33783400  |
| H | 0.76768800  | -0.47855400 | -2.65028300 |
| O | 1.80551000  | -2.40499900 | -1.77790000 |
| H | 1.19569100  | -1.21930400 | -2.40645100 |
| C | 3.08933400  | -2.38365300 | -1.80053800 |
| H | 3.56236200  | -3.06963500 | -1.06633900 |
| O | 3.80892300  | -1.69384600 | -2.52916700 |

### **CO<sub>2</sub>**

|   |            |            |             |
|---|------------|------------|-------------|
| C | 0.00000000 | 0.00000000 | 0.00000000  |
| O | 0.00000000 | 0.00000000 | 1.16072300  |
| O | 0.00000000 | 0.00000000 | -1.16072300 |

### **H<sub>2</sub>**

|   |            |            |             |
|---|------------|------------|-------------|
| H | 0.00000000 | 0.00000000 | 0.37228800  |
| H | 0.00000000 | 0.00000000 | -0.37228800 |

### **HCOOH**

|   |             |             |             |
|---|-------------|-------------|-------------|
| C | -0.12520300 | 0.36786100  | 0.00002600  |
| H | -0.03801200 | 1.46519900  | 0.00005300  |
| O | 1.04596000  | -0.28112700 | 0.00003600  |
| H | 1.78435900  | 0.34473900  | -0.00029100 |

O            -1.17035100 -0.22101100 -0.00002600

## References:

1. Gaussian 09, Revision E.01, M. J. Frisch, G. W. Trucks, H. B. Schlegel, G. E. Scuseria, M. A. Robb, J. R. Cheeseman, G. Scalmani, V. Barone, B. Mennucci, G. A. Petersson, H. Nakatsuji, M. Caricato, X. Li, H. P. Hratchian, A. F. Izmaylov, J. Bloino, G. Zheng, J. L. Sonnenberg, M. Hada, M. Ehara, K. Toyota, R. Fukuda, J. Hasegawa, M. Ishida, T. Nakajima, Y. Honda, O. Kitao, H. Nakai, T. Vreven, J. A. Montgomery, Jr., J. E. Peralta, F. Ogliaro, M. Bearpark, J. J. Heyd, E. Brothers, K. N. Kudin, V. N. Staroverov, T. Keith, R. Kobayashi, J. Normand, K. Raghavachari, A. Rendell, J. C. Burant, S. S. Iyengar, J. Tomasi, M. Cossi, N. Rega, J. M. Millam, M. Klene, J. E. Knox, J. B. Cross, V. Bakken, C. Adamo, J. Jaramillo, R. Gomperts, R. E. Stratmann, O. Yazyev, A. J. Austin, R. Cammi, C. Pomelli, J. W. Ochterski, R. L. Martin, K. Morokuma, V. G. Zakrzewski, G. A. Voth, P. Salvador, J. J. Dannenberg, S. Dapprich, A. D. Daniels, O. Farkas, J. B. Foresman, J. V. Ortiz, J. Cioslowski, and D. J. Fox, Gaussian, Inc., Wallingford CT, 2013.
2. Becke, A. D. Density-functional Thermochemistry. III. The Role of Exact Exchange. *J. Chem. Phys.* 1993, 98 (7), 5648–5652.
3. Lee, C.; Yang, W.; Parr, R. G. Development of the Colle-Salvetti Correlation-Energy Formula into a Functional of the Electron Density. *Phys. Rev. B Condens. Matter* 1988, 37 (2), 785–789.
4. Grimme, S.; Antony, J.; Ehrlich, S.; Krieg, H. A Consistent and Accurate Ab Initio Parametrization of Density Functional Dispersion Correction (DFT-D) for the 94 Elements H-Pu. *J. Chem. Phys.* 2010, 132 (15), 154104.
5. McLean, A. D.; Chandler, G. S. Contracted Gaussian Basis Sets for Molecular Calculations. I. Second Row Atoms, Z=11–18. *J. Chem. Phys.* 1980, 72 (10), 5639–5648.
6. Krishnan, R.; Binkley, J. S.; Seeger, R.; Pople, J. A. Self-consistent Molecular Orbital Methods. XX. A Basis Set for Correlated Wave Functions. *J. Chem. Phys.* 1980, 72 (1), 650–654.
7. Scalmani, G.; Frisch, M. J. Continuous Surface Charge Polarizable Continuum Models of Solvation. I. General Formalism. *J. Chem. Phys.* 2010, 132 (11), 114110.
8. Hay, P. J.; Wadt, W. R. Ab Initio Effective Core Potentials for Molecular Calculations. Potentials for the Transition Metal Atoms Sc to Hg. *J. Chem. Phys.* 1985, 82 (1), 270–283.

9. Hay, P. J.; Wadt, W. R. Ab Initio Effective Core Potentials for Molecular Calculations. Potentials for K to Au Including the Outermost Core Orbitals. *J. Chem. Phys.* 1985, 82 (1), 299–310.
10. Wadt, W. R.; Hay, P. J. Ab Initio Effective Core Potentials for Molecular Calculations. Potentials for Main Group Elements Na to Bi. *J. Chem. Phys.* 1985, 82 (1), 284–298.
11. Fukui, K. The Path of Chemical Reactions - the IRC Approach. *Acc. Chem. Res.* 1981, 14 (12), 363–368.
12. Dennington, R., Keith, T., & Millam, J. (2009). Gauss view, version 5. Semichem Inc.
13. Ribeiro, R. F.; Marenich, A. V.; Cramer, C. J.; Truhlar, D. G. Use of Solution-Phase Vibrational Frequencies in Continuum Models for the Free Energy of Solvation. *J. Phys. Chem. B* 2011, 115 (49), 14556–14562.
14. CCL:G: Gaussian Delta G of solution calculation?. Ccl.net. <http://www.ccl.net/chemistry/resources/messages/2011/12/01.001-dir/> (accessed 2023-07-13).
15. Grimme, S.; Ehrlich, S.; Goerigk, L. Effect of the Damping Function in Dispersion Corrected Density Functional Theory. *J. Comput. Chem.* 2011, 32 (7), 1456–1465.
